# Supplementary material
Source: publisher figshare collection journal article supplement (https://tandf.figshare.com/articles/dataset/_/18394223)
Supplement: Supplementary file 1 [file 1]

# Supplemental Material for “Model-based joint curve registration and classification”

Lin Tang<sup>a,1</sup>, Pengcheng Zeng<sup>b,1</sup>, Jian Qing Shi<sup>\*c</sup>, and Won-Seok Kim<sup>d</sup>

<sup>a</sup>Yunnan Key Laboratory of Statistical Modeling and Data Analysis, Yunnan University, Kunming, Yunnan, China

<sup>b</sup>Institute of Mathematical Sciences, ShanghaiTech University, Shanghai, China

<sup>c</sup>Department of Statistics and Data Science, Southern University of Science and Technology, Shenzhen, China

<sup>d</sup>Department of Rehabilitation Medicine, Seoul National University College of Medicine, Seoul National University Bundang Hospital, Seongnam, South Korea

## Assumptions for Theorems

Let  $\langle \cdot, \cdot \rangle$  and  $\|\cdot\|$  be the  $L^2(\mathcal{T})$  inner product and norm, respectively. For notational simplicity, let  $\tilde{\mathbf{x}}_{ai}(t) = \mathbf{x}_{ai}(g^{-1}(t))$  and define the covariance of the curve  $\tilde{\mathbf{x}}_{ai}(t)$  as  $K_{x_a}(s, t) = \text{Cov}[\tilde{\mathbf{x}}_{ai}(s), \tilde{\mathbf{x}}_{ai}(t)]$ , where  $K_{x_a}(s, t)$  is continuous on the interval  $[0, 1]$ . Then by Mercer’s Theorem we have

$$K_{x_a}(s, t) = \sum_{l=1}^{\infty} \lambda_{al} \phi_{al}(s) \phi_{al}(t),$$

where  $\lambda_{a1} > \lambda_{a2} > \dots > 0$  are eigenvalues and  $\phi_{a1}(t), \phi_{a2}(t) \dots$  are eigenfunctions of the covariance operator corresponding to  $K_{x_a}(s, t)$ . Then by the Karhunen-Loève representation, the process  $\tilde{\mathbf{x}}_{ai}$

---

<sup>1</sup>Both authors contributed equally to this work.

<sup>\*</sup>Corresponding author, email: shijq@sustech.edu.cn

and the functional coefficient  $\beta_a(t)$  follows the following eigen decompositions

$$\tilde{\mathbf{x}}_{ai}(t) = \sum_{l=1}^{\infty} p_{ail} \phi_{al}(t) \quad \beta_a(t) = \sum_{l=1}^{\infty} e_{al} \phi_{al}(t),$$

where  $p_{ail} = \langle \tilde{\mathbf{x}}_{ai}, \phi_{al} \rangle$  are uncorrelated random variables with zero mean and variance  $\lambda_{al}$  and  $e_{al} = \langle \beta_a, \phi_{al} \rangle$ .

In practice,  $K_{x_a}(s, t)$  is unknown and we can take the empirical version by

$$\hat{K}_{x_a}(s, t) = \sum_{l=1}^{\infty} \hat{\lambda}_{al} \hat{\phi}_{al}(s) \hat{\phi}_{al}(t),$$

where  $(\hat{\lambda}_{al}, \hat{\phi}_{al})$  is the estimator of  $(\lambda_{al}, \phi_{al})$  with  $\hat{\lambda}_{a1} \geq \hat{\lambda}_{a2} \dots \geq 0$ .

Therefore, the systematic component in equation (12) can be rewritten as

$$\eta_i = \mathbf{v}_i^T \mathbf{b} + \int_0^1 \tilde{\mathbf{x}}_i(t) \beta(t) dt = \mathbf{v}_i^T \mathbf{b} + \sum_{a=1}^2 \sum_{l=1}^{\infty} \tilde{p}_{ail} e_{al} = \mathbf{v}_i^T \mathbf{b} + \sum_{a=1}^2 \sum_{l=1}^{K_x} \tilde{p}_{ail} e_{al} + R_i,$$

where  $\tilde{p}_{ail} = \langle \tilde{\mathbf{x}}_{ai}, \hat{\phi}_{al} \rangle$ ,  $R_i = \sum_{a=1}^2 \sum_{l=K_x+1}^{\infty} \tilde{p}_{ail} e_{al}$  and  $K_x$  is the tuning parameter which is set to be sufficiently large.

For notational simplicity, we define  $\tilde{\mathbf{p}}_i = (\tilde{\mathbf{p}}_{1i}^T, \tilde{\mathbf{p}}_{2i}^T)^T = (\tilde{p}_{1i1}, \dots, \tilde{p}_{1iK_x}, \tilde{p}_{2i1}, \dots, \tilde{p}_{2iK_x})^T$ ,  $\mathbf{e} = (\mathbf{e}_1^T, \mathbf{e}_2^T)^T = (e_{11}, \dots, e_{1K_x}, e_{21}, \dots, e_{2K_x})^T$ ,  $\mathbf{Y} = (y_1, \dots, y_N)^T$ ,  $\mathbf{v} = (\mathbf{v}_1^T, \dots, \mathbf{v}_N^T)^T$ ,  $\tilde{\mathbf{X}} = (\tilde{\mathbf{x}}_1(t), \dots, \tilde{\mathbf{x}}_N(t))$ ,  $\boldsymbol{\eta} = (\eta_1, \dots, \eta_N)^T$ .

Let  $\mathbf{D} = (\mathbf{v}, \tilde{\mathbf{X}})$  and  $\boldsymbol{\theta} = (\mathbf{b}^T, \mathbf{e}^T)^T$  be the unknown parameter vector of the models defined in equation (11) and equation (12). Then the estimation  $\hat{\boldsymbol{\theta}} = (\hat{\mathbf{b}}^T, \hat{\mathbf{e}}^T)^T$  is obtained by maximizing the following log-likelihood function

$$\ell(\boldsymbol{\theta}) \triangleq \ell(\mathbf{Y}; \boldsymbol{\eta}) = \sum_{i=1}^N \ell_i(y_i; \eta_i) = \sum_{i=1}^N \{y_i \zeta(\mathbf{v}_i, \mathbf{x}_i) + \mathcal{B}[\zeta(\mathbf{v}_i, \mathbf{x}_i)] + \mathcal{C}(y_i)\}$$

For simplicity, let  $C$  be a constant whose value might change according to different circumstances. Denote  $\dot{\ell}_{i,d}(y_i; d)$  and  $\ddot{\ell}_{i,d}(y_i; d)$  as the first- and second-order derivative of  $\ell_i(y_i; d)$  with respect to  $d$ , respectively. Also, similar to [1], we define

$$I(\mathbf{D}) = -E[\ddot{\ell}_{\boldsymbol{\eta}}(\mathbf{Y}; \boldsymbol{\eta}) | \mathbf{D}] = -E\left[\sum_{i=1}^N \ddot{\ell}_{i, \eta_i}(y_i; \eta_i) | \mathbf{D}\right],$$

where  $\eta_i = \mathbf{v}_i^T \mathbf{b} + \int_0^1 \tilde{\mathbf{x}}_i(t) \beta(t) dt$ .

In model (11), the response variable  $y_i$  is related to both the scalar variables and the functional variables. So, the main complicated issue comes from the dependence between  $\mathbf{v}_i$  and  $\tilde{\mathbf{x}}_i(t)$ . To solve this problem, similar to [2], we define

$$\mathbf{G}(\tilde{\mathbf{X}}) = \frac{\mathbb{E}(\mathbf{v}\ddot{\ell}_\eta(\mathbf{Y}; \eta)|\tilde{\mathbf{X}})}{\mathbb{E}(\ddot{\ell}_\eta(\mathbf{Y}; \eta)|\tilde{\mathbf{X}})}, \text{ and } \mathbf{v} = \tilde{\mathbf{v}} + \mathbf{G}(\tilde{\mathbf{X}}),$$

where  $\tilde{\mathbf{v}} = (\tilde{v}_1, \dots, \tilde{v}_{p+1})^{p+1}$  is a zero mean  $(p+1)$ -dimensional random vector and  $\mathbf{G}(\tilde{\mathbf{X}}) = (G_1(\tilde{\mathbf{X}}), \dots, G_{p+1}(\tilde{\mathbf{X}}))^T$  is a  $(p+1)$ -dimensional functional vector with  $G_j(\tilde{\mathbf{X}}) \in L^2(\mathcal{T})$  for  $j = 1, \dots, p+1$ .

Suppose that the following assumptions hold

(A1) For each  $i \in \{1, \dots, N\}$ ,  $\mathbb{E}\|\tilde{\mathbf{x}}_i\|^4 < \infty$ .

(A2) For each  $a \in [1, 2]$  and  $l$ ,  $\mathbb{E}(p_{ail}^4) \leq C\lambda_{al}^2$  with the eigenvalue  $\lambda_{al}$  satisfies  $C^{-1}l^{-\alpha} \leq \lambda_{al} \leq Cl^{-\alpha}$  and  $\lambda_{al} - \lambda_{a(l+1)} \geq C^{-1}l^{-\alpha-1}$  for  $l \geq 1$  and some constant  $\alpha > 1$ . In addition,  $|e_{al}^*| \leq Cl^{-\gamma}$  for some constant  $\gamma > \alpha/2 + 1$ .

(A3) The tuning parameter  $K_x$  satisfies

$$K_x \asymp N^{\frac{1}{\alpha+2\gamma}},$$

where the notation  $a_N \asymp b_N$  means that there exist constants  $0 < L < M < \infty$  such that  $L \leq a_N/b_N \leq M$  for all  $N$ .

(A4) For each  $i$ , the scalar covariates  $\mathbf{v}_i$  satisfies  $\mathbb{E}\|\mathbf{v}_i\|^4 < \infty$ .

(A5)  $\mathbb{E}(\tilde{\mathbf{v}}) = \mathbf{0}$ ,

$$\mathbf{\Omega}_1 = \mathbb{E}\left\{\sum_{i=1}^N \ddot{\ell}_{i,\eta_i^*}(y_i; \eta_i^*) \tilde{\mathbf{v}}_i \tilde{\mathbf{v}}_i^T\right\} \text{ and } \mathbf{\Omega}_2 = \mathbb{E}\left\{\sum_{i=1}^N \dot{\ell}_{i,\eta_i^*}^2(y_i; \eta_i^*) \tilde{\mathbf{v}}_i \tilde{\mathbf{v}}_i^T\right\},$$

where  $\mathbf{\Omega}_1$  and  $\mathbf{\Omega}_2$  are assumed to be positive definite matrices and  $\eta_i^* = \mathbf{v}_i^T \mathbf{b}^* + \int_0^1 \tilde{\mathbf{x}}_i(t) \boldsymbol{\beta}^*(t) dt$ .

(A6)  $|I(\mathbf{D})| < C$  and  $I(\mathbf{D})$  satisfies the first-order Lipschitz condition.

(A7) The true value  $\boldsymbol{\theta}_x^*$  of  $\boldsymbol{\theta}_x$  is unique and  $\hat{\boldsymbol{\theta}}_x \xrightarrow{p} \boldsymbol{\theta}_x^*$  where  $\hat{\boldsymbol{\theta}}_x$  is the MLE of  $\boldsymbol{\theta}_x$ .

(A8) For  $i = 1, \dots, N$ , the likelihood function  $\ell_i(\boldsymbol{\theta}_x)$  is thrice continuously differentiable with respect to  $\boldsymbol{\theta}_x$ .

(A9) There exist positive definite matrices  $\mathbf{A}(\boldsymbol{\theta}_x^*)$  and  $\mathbf{B}(\boldsymbol{\theta}_x^*)$  such that

$$\lim_{N \rightarrow \infty} -\frac{1}{N} \sum_{i=1}^N \partial_{\theta_x}^2 \ell_i(\boldsymbol{\theta}_x^*) = \mathbf{A}(\boldsymbol{\theta}_x^*), \quad \lim_{N \rightarrow \infty} \frac{1}{N} \sum_{i=1}^N \partial_{\theta_x} \ell_i(\boldsymbol{\theta}_x^*) \partial_{\theta_x} \ell_i(\boldsymbol{\theta}_x^*)^T = \mathbf{B}(\boldsymbol{\theta}_x^*).$$

**Remark 1.** Assumptions (A1)-(A3) are quite usual in the settings of functional linear model (see [3] and [4]). Assumption (A1) requires that  $\tilde{\mathbf{x}}_i$  has a finite fourth moment and is necessary to get the  $L^2$  convergence of the estimated functional coefficients. In particular, the condition  $E(p_{al}^4) \leq C\lambda_{al}^2$  in Assumption (A2) holds if the random process  $\tilde{\mathbf{x}}_i$  is a Gaussian Process. The requirements of the eigenvalues in Assumption (A2) prevent the spacings between adjacent eigenvalues from being too small and ask that the slope function  $\beta(t)$  is smoother than the sample path of  $\tilde{\mathbf{x}}_i$  [2]. They are of great importance in ensuring the rate of convergence in Theorem 2.3. The last part of Assumptions (A2) prevents the coefficients  $e_{al}^*$  from decreasing too slowly. To optimize the convergence rate of the functional coefficients, requirement of smoothing parameter in Assumption (A3) is needed. Assumptions (A4)-(A6) are used to deal with the linear part with scalar variables. Assumption (A4) is analogy to Assumption (A1). The condition of the Fisher information  $I(\mathbf{D})$  in Assumption (A6) is analogous to [1]. Assumptions (A7)-(A8) are commonly used conditions in parametric models, and they are applied here to develop the asymptotical consistency of the MLE for the functional nonlinear mixed effects model for curve alignment.

## Technical lemmas and proofs.

Let  $\tilde{\eta}_i = \mathbf{v}_i^T \mathbf{b}^* + \tilde{\mathbf{p}}_i^T \mathbf{e}^*$ , where  $\mathbf{b}^*$  and  $\mathbf{e}^*$  denote the true values of  $\mathbf{b}$  and  $\mathbf{e}$ , respectively.

**Lemma 1.** Let  $R_i = \int_0^1 \tilde{\mathbf{x}}_i(t) \boldsymbol{\beta}^*(t) dt - \tilde{\mathbf{p}}_i^T \mathbf{e}^*$  for  $i = 1, \dots, N$ . Then under Assumptions (A1)-(A6), we have

$$\|R_i\|^2 = \|\eta_i^* - \tilde{\eta}_i\|^2 = O_p(N^{-(2\gamma+\alpha-1)/(\alpha+2\gamma)}).$$

Thus

$$\eta_i^* - \tilde{\eta}_i = O_p(N^{-(2\gamma+\alpha-1)/2(\alpha+2\gamma)}).$$

**Proof.** Note that

$$\begin{aligned}
R_i &= \int_0^1 \tilde{\mathbf{x}}_i(t) \boldsymbol{\beta}^*(t) dt - \tilde{\mathbf{p}}_i^T \mathbf{e}^* \\
&= \sum_{a=1}^2 \sum_{l=1}^{\infty} \langle \tilde{\mathbf{x}}_{ai}, \phi_{al} \rangle \langle \boldsymbol{\beta}_a^*, \phi_{al} \rangle - \sum_{a=1}^2 \sum_{l=1}^{K_x} \langle \tilde{\mathbf{x}}_{ai}, \hat{\phi}_{al} \rangle \langle \boldsymbol{\beta}_a^*, \phi_{al} \rangle \\
&= \sum_{a=1}^2 \sum_{l=1}^{K_x} \langle \tilde{\mathbf{x}}_{ai}, \phi_{al} \rangle \langle \boldsymbol{\beta}_a^*, \phi_{al} \rangle - \sum_{a=1}^2 \sum_{l=1}^{K_x} \langle \tilde{\mathbf{x}}_{ai}, \hat{\phi}_{aj} \rangle \langle \boldsymbol{\beta}_a^*, \phi_{al} \rangle \\
&\quad + \sum_{a=1}^2 \sum_{l=K_x+1}^{\infty} \langle \tilde{\mathbf{x}}_{ai}, \phi_{al} \rangle \langle \boldsymbol{\beta}_a^*, \phi_{al} \rangle \\
&= \sum_{a=1}^2 \sum_{l=1}^{K_x} \langle \tilde{\mathbf{x}}_{ai}, \phi_{al} - \hat{\phi}_{al} \rangle e_{al}^* + \sum_{a=1}^2 \sum_{l=K_x+1}^{\infty} \langle \tilde{\mathbf{x}}_{ai}, \phi_{al} \rangle e_{al}^* \\
&= I_1 + I_2
\end{aligned}$$

where  $I_1 = \sum_{a=1}^2 \sum_{l=1}^{K_x} \langle \tilde{\mathbf{x}}_{ai}, \phi_{al} - \hat{\phi}_{al} \rangle e_{al}^*$ , and

$$I_2 = \sum_{a=1}^2 \sum_{l=K_x+1}^{\infty} \langle \tilde{\mathbf{x}}_{ai}, \phi_{al} \rangle e_{al}^* = \sum_{a=1}^2 \sum_{l=K_x+1}^{\infty} p_{ail} e_{al}^*.$$

Since  $\|\hat{\phi}_{al} - \phi_{al}\|^2 = O_p(N^{-1}l^2)$ , then it follows from Assumptions (A1)-(A3) that

$$\begin{aligned}
\|I_1\|^2 &= \left\| \sum_{a=1}^2 \sum_{l=1}^{K_x} \langle \tilde{\mathbf{x}}_{ai}, \phi_{al} - \hat{\phi}_{al} \rangle e_{al}^* \right\|^2 \\
&\leq 2K_x \sum_{l=1}^{K_x} \|\langle \tilde{\mathbf{x}}_{ai}, \phi_{al} - \hat{\phi}_{al} \rangle e_{al}^*\|^2 \\
&\leq 2K_x \sum_{l=1}^{K_x} \|\phi_{al} - \hat{\phi}_{al}\|^2 |e_{al}^*|^2 \\
&\leq O_P(K_x) \sum_{l=1}^{K_x} N^{-1} l^2 l^{-2\gamma} \\
&\leq O_P(N^{-1} K_x) \sum_{l=1}^{K_x} l^{-2\gamma+2} \\
&\leq O_P(N^{-1} K_x) = O_P(N^{-\frac{2\gamma+\alpha+1}{\alpha+2\gamma}})
\end{aligned}$$

For  $I_2$ , note that  $p_{ail}$  are uncorrelated random variables with zero mean and variance  $\lambda_{al}$ , then

we have

$$\begin{aligned}
\mathbb{E}(\|I_2\|^2) &= \mathbb{E}\left(\sum_{a=1}^2 \sum_{l=K_x+1}^{\infty} p_{ail} e_{al}^*\right)^2 \\
&= \sum_{a=1}^2 \sum_{l=K_x+1}^{\infty} e_{al}^{*2} \lambda_{al} \\
&\leq 2C \sum_{l=K_x+1}^{\infty} l^{-(2\gamma+\alpha)} \\
&= O_p(K_x^{-(2\gamma+\alpha-1)}) = O_p(N^{-\frac{2\gamma+\alpha-1}{\alpha+2\gamma}})
\end{aligned}$$

Then  $R_i = I_1 + I_2 = O_p(N^{-\frac{2\gamma+\alpha-1}{2(\alpha+2\gamma)}}) + O_p(N^{-\frac{2\gamma+\alpha-1}{2(\alpha+2\gamma)}}) = O_p(N^{-\frac{2\gamma+\alpha-1}{2(\alpha+2\gamma)}})$  holds, which indicates that  $\|R_i\|^2 = \|\eta_i^* - \tilde{\eta}_i\|^2 = O_p(N^{-(2\gamma+\alpha-1)/(\alpha+2\gamma)})$ , thus Lemma 1 holds.  $\square$

Let  $\tilde{\mathbf{v}}_i = \mathbf{v}_i - \mathbf{G}(\tilde{\mathbf{x}}_i)$  and

$$\check{\mathbf{b}} = \arg \max_{\mathbf{b}} \sum_{i=1}^N \ell_i(y_i; \tilde{\mathbf{v}}_i^T \mathbf{b} + \tilde{\mathbf{p}}_i^T \mathbf{e}^* + \mathbf{G}(\tilde{\mathbf{x}}_i) \mathbf{b}^*).$$

Then the following Lemma says that the estimation  $\check{\mathbf{b}}$  is asymptotically distributed as normal distribution.

**Lemma 2.** *Under Assumptions (A1)-(A9), we have*

$$\sqrt{N}(\check{\mathbf{b}} - \mathbf{b}^*) \rightarrow N(\mathbf{0}, \mathbf{\Omega}_1^{-1} \mathbf{\Omega}_2 \mathbf{\Omega}_1^{-1}),$$

where  $\mathbf{\Omega}_1 = E\left\{\sum_{i=1}^N \ddot{\ell}_{i,\eta_i^*}(y_i; \eta_i^*) \tilde{\mathbf{v}}_i \tilde{\mathbf{v}}_i^T\right\}$ ,  $\mathbf{\Omega}_2 = E\left\{\sum_{i=1}^N \dot{\ell}_{i,\eta_i^*}^2(y_i; \eta_i^*) \tilde{\mathbf{v}}_i \tilde{\mathbf{v}}_i^T\right\}$  and  $\tilde{\mathbf{v}}_i = \mathbf{v}_i - \mathbf{G}(\tilde{\mathbf{x}}_i)$ .

**Proof.** Let  $\boldsymbol{\omega} = \sqrt{N}(\mathbf{b} - \mathbf{b}^*)$  and  $\check{\boldsymbol{\omega}} = \sqrt{N}(\check{\mathbf{b}} - \mathbf{b}^*)$ , which according to the definition of  $\check{\mathbf{b}}$ , is obtained by maximizing the following function

$$M(\boldsymbol{\omega}) = \sum_{i=1}^N \ell_i(y_i; \tilde{\mathbf{v}}_i^T \mathbf{b}^* + \tilde{\mathbf{p}}_i^T \mathbf{e}^* + \mathbf{G}(\tilde{\mathbf{x}}_i) \mathbf{b}^* + \tilde{\mathbf{v}}_i^T \boldsymbol{\omega} / \sqrt{N}) - \sum_{i=1}^N \ell_i(y_i; \mathbf{v}_i^T \mathbf{b}^* + \tilde{\mathbf{p}}_i^T \mathbf{e}^*).$$

Taking a second-order Taylor's expansion of  $M(\boldsymbol{\omega})$  yields

$$M(\boldsymbol{\omega}) = \frac{1}{\sqrt{N}} \sum_{i=1}^N \dot{\ell}_{i,\tilde{\eta}_i}(y_i; \tilde{\eta}_i) \tilde{\mathbf{v}}_i^T \boldsymbol{\omega} + \frac{1}{2} \boldsymbol{\omega}^T \boldsymbol{\Sigma} \boldsymbol{\omega},$$

where

$$\boldsymbol{\Sigma} = \frac{1}{N} \sum_{i=1}^N \ddot{\ell}_{i, \tilde{\eta}_i}(y_i; \tilde{\eta}_i + \nu_i) \tilde{\mathbf{v}}_i \tilde{\mathbf{v}}_i^T$$

with  $\nu_i$  lies between 0 and  $\tilde{\mathbf{v}}_i \boldsymbol{\omega} / \sqrt{N}$ . It follows from [5] that  $\boldsymbol{\Sigma} = -\boldsymbol{\Omega}_1 + o_p(1)$ .

On the other hand,

$$\begin{aligned} \frac{1}{N} \sum_{i=1}^N \dot{\ell}_{i, \tilde{\eta}_i}(y_i; \tilde{\eta}_i) \tilde{\mathbf{v}}_i^T &= \frac{1}{\sqrt{N}} \sum_{i=1}^N \dot{\ell}_{i, \eta_i^*}(y_i; \eta_i^*) \tilde{\mathbf{v}}_i^T + \frac{1}{\sqrt{N}} \sum_{i=1}^N \ddot{\ell}_{i, \eta_i^*}(y_i; \eta_i^*) \tilde{\mathbf{v}}_i^T (\tilde{\eta}_i - \eta_i^*) \\ &\quad + o_p(1) \\ &= I_3 + I_4 + o_p(1), \end{aligned}$$

where

$$I_3 = \frac{1}{\sqrt{N}} \sum_{i=1}^N \dot{\ell}_{i, \eta_i^*}(y_i; \eta_i^*) \tilde{\mathbf{v}}_i^T \text{ and } I_4 = \frac{1}{\sqrt{N}} \sum_{i=1}^N \ddot{\ell}_{i, \eta_i^*}(y_i; \eta_i^*) \tilde{\mathbf{v}}_i^T (\tilde{\eta}_i - \eta_i^*).$$

It is easy to find that  $I_4 = o_p(1)$ . By the Lindeberg-Feller central limit theory, we have  $I_3 \rightarrow N(\mathbf{0}, \boldsymbol{\Omega}_2)$ . Then,

$$M(\boldsymbol{\omega}) = I_3^T \boldsymbol{\omega} - \frac{1}{2} \boldsymbol{\omega}^T \boldsymbol{\Omega}_1 \boldsymbol{\omega} + o_p(1).$$

The results of [6] and [7] show that

$$\check{\boldsymbol{\omega}} = \boldsymbol{\Omega}_1^{-1} I_3 + o_p(1),$$

then Lemma 2 holds from the Slutsky Theorem. □

**Lemma 3.** *Under Assumptions (A1)-(A9), we have*

$$\|\hat{\boldsymbol{\theta}} - \check{\boldsymbol{\theta}}\|^2 = O_p(N^{-\frac{2\gamma-1}{\alpha+2\gamma}}),$$

where  $\hat{\boldsymbol{\theta}} = (\hat{\mathbf{b}}^T, \hat{\mathbf{e}}^T)^T$  and  $\check{\boldsymbol{\theta}} = (\check{\mathbf{b}}^T, \mathbf{e}^{*T})^T$ .

**Proof.** Taking a first-order Taylor's expansion of  $\dot{\ell}(\hat{\boldsymbol{\theta}}) = \frac{\partial \ell(\boldsymbol{\theta})}{\partial \boldsymbol{\theta}}|_{\boldsymbol{\theta}=\hat{\boldsymbol{\theta}}}$  at  $\check{\boldsymbol{\theta}}$  yields

$$0 = \dot{\ell}(\hat{\boldsymbol{\theta}}) = \dot{\ell}(\check{\boldsymbol{\theta}}) + \ddot{\ell}(\bar{\boldsymbol{\theta}})(\hat{\boldsymbol{\theta}} - \check{\boldsymbol{\theta}}) + o_p(1),$$

where  $\bar{\boldsymbol{\theta}}$  lies between  $\hat{\boldsymbol{\theta}}$  and  $\check{\boldsymbol{\theta}}$ ,  $\dot{\ell}(\check{\boldsymbol{\theta}}) = \frac{\partial \ell(\boldsymbol{\theta})}{\partial \boldsymbol{\theta}}|_{\boldsymbol{\theta}=\check{\boldsymbol{\theta}}}$  and  $\ddot{\ell}(\bar{\boldsymbol{\theta}}) = \frac{\partial^2 \ell(\boldsymbol{\theta})}{\partial \boldsymbol{\theta} \partial \boldsymbol{\theta}}|_{\boldsymbol{\theta}=\bar{\boldsymbol{\theta}}}$ .

Then we have

$$\hat{\boldsymbol{\theta}} - \check{\boldsymbol{\theta}} = -[\ddot{\ell}(\bar{\boldsymbol{\theta}})]^{-1} \dot{\ell}(\check{\boldsymbol{\theta}}).$$

Denote

$$\dot{\ell}(\check{\boldsymbol{\theta}}) = \left\{ \left( \frac{\partial \ell(\check{\boldsymbol{\theta}})}{\partial \mathbf{b}} \right)^\top, \left( \frac{\partial \ell(\check{\boldsymbol{\theta}})}{\partial \mathbf{e}} \right)^\top \right\}^\top = \sum_{i=1}^N \dot{\ell}_{i, \check{\eta}_i}(y_i; \check{\eta}_i) (\mathbf{v}_i^\top, \tilde{\mathbf{p}}_i^\top)^\top,$$

where  $\check{\eta}_i = \mathbf{v}_i^\top \check{\mathbf{b}} + \tilde{\mathbf{p}}_i^\top \mathbf{e}^*$ .

Note that

$$\frac{\partial \ell(\check{\boldsymbol{\theta}})}{\partial \mathbf{b}} = \sum_{i=1}^N \dot{\ell}_{i, \check{\eta}_i}(y_i; \check{\eta}_i) \mathbf{v}_i = \sum_{i=1}^N \dot{\ell}_{i, \eta_i^*}(y_i; \eta_i^*) \mathbf{v}_i + \sum_{i=1}^N \ddot{\ell}_{i, \bar{\eta}_i}(y_i; \bar{\eta}_i) (\mathbf{v}_i^\top (\check{\mathbf{b}} - \mathbf{b}^*) + R_i) \mathbf{v}_i,$$

and

$$\frac{\partial \ell(\check{\boldsymbol{\theta}})}{\partial \mathbf{e}} = \sum_{i=1}^N \dot{\ell}_{i, \check{\eta}_i}(y_i; \check{\eta}_i) \tilde{\mathbf{p}}_i = \sum_{i=1}^N \dot{\ell}_{i, \eta_i^*}(y_i; \eta_i^*) \tilde{\mathbf{p}}_i + \sum_{i=1}^N \ddot{\ell}_{i, \bar{\eta}_i}(y_i; \bar{\eta}_i) (\tilde{\mathbf{p}}_i^\top (\check{\mathbf{e}} - \mathbf{e}^*) + R_i) \tilde{\mathbf{p}}_i,$$

where  $\bar{\eta}_i$  lies between  $\eta_i^*$  and  $\check{\eta}_i$ .

Similar to [8], we have

$$\mathbb{E} \left( \left\| \sum_{i=1}^N \dot{\ell}_{i, \eta_i^*}(y_i; \eta_i^*) \mathbf{v}_i \right\| \right) = O(N^{1/2}). \quad (\text{S1})$$

The Assumption (A2) and Lemma 1 indicate that

$$\begin{aligned} \left\| \sum_{i=1}^N \ddot{\ell}_{i, \bar{\eta}_i}(y_i; \bar{\eta}_i) (\mathbf{v}_i^\top (\check{\mathbf{b}} - \mathbf{b}^*) + R_i) \mathbf{v}_i \right\| &= O_p(N^{1/2}) + O_p(N \cdot N^{-(2\gamma+\alpha-1)/2(\alpha+2\gamma)}) \\ &= O_p(\sqrt{NK_x}). \end{aligned} \quad (\text{S2})$$

Equation (S1) and (S2) show that  $\partial \ell(\check{\boldsymbol{\theta}}) / \partial \mathbf{b} = O_p(\sqrt{NK_x})$ . Similarly, we have  $\partial \ell(\check{\boldsymbol{\theta}}) / \partial \mathbf{e} = O_p(\sqrt{NK_x})$ . Therefore,  $\dot{\ell}(\check{\boldsymbol{\theta}}) = O_p(\sqrt{NK_x})$ .

Similar to Lemma A.3 of [9], we have  $\left\| \left( \frac{1}{N} \ddot{\ell}(\bar{\boldsymbol{\theta}}) \right)^{-1} \right\| = O_p(\lambda_{K_x}^{-1/2}) = O_p(K_x^{\alpha/2})$ , which yields

$$\begin{aligned} \|\hat{\boldsymbol{\theta}} - \check{\boldsymbol{\theta}}\| &\leq \left\| \left( \frac{1}{N} \ddot{\ell}(\bar{\boldsymbol{\theta}}) \right)^{-1} \right\| \left\| \frac{1}{N} \dot{\ell}(\check{\boldsymbol{\theta}}) \right\| \\ &= O_p(K_x^{\alpha/2}) O_p(N^{-(2\gamma+\alpha-1)/2(\alpha+2\gamma)}) \\ &= O_p(N^{-(2\gamma-1)/2(\alpha+2\gamma)}) \end{aligned}$$

Thus, the result  $\|\hat{\boldsymbol{\theta}} - \check{\boldsymbol{\theta}}\|^2 = O_p(N^{-(2\gamma-1)/(\alpha+2\gamma)})$  holds.  $\square$

**Proof of Theorem 2.1.** The identifiability proof goes as follows. By assumptions in model (1), the random effects and the random error can be integrated into a new Gaussian process error



denoted as  $\epsilon_i^*(t)$  with  $E\{\epsilon_i^*(t)\} = 0$ . Then we have that  $\epsilon_i^*(t) = x_i(t) - \tau(g_i(t))$ , thus there is no ambiguity about the error term. Suppose that  $E\{x_i(t)\} = \tau_1(g_{1i}(t)) = \tau_2(g_{2i}(t))$  for all  $i = 1, \dots, N$ , then we have  $\tau_1(t) = \tau_2(g_{2i}(g_{1i}^{-1}(t)))$ . Since the left-hand side of this equation doesn't depend on  $i$ , we have that  $g_{2i}(g_{1i}^{-1}(t)) = l(t)$  for all  $i$  some function  $l(\cdot)$ . Then  $g_{1i}^{-1}(t) = g_{2i}^{-1}(l(t))$  for all  $i$ . The assumption in Theorem 1 shows that  $E(g_{1i}) = E(g_{2i})$ , then we have  $l(t) = t$ . Therefore,  $g_{1i}(t) = g_{2i}(t)$  for all  $i$  and the warping functions are identifiable.  $\square$

**Proof of Theorem 2.2.** Let  $\hat{\eta}_i = \mathbf{v}_i^T \hat{\mathbf{b}} + \tilde{\mathbf{p}}_i^T \hat{\mathbf{e}}$  and for any  $\mathbf{z} \in \mathbb{R}^{p+1}$ , define  $\hat{\eta}_i(\mathbf{z}) = \mathbf{v}_i^T \hat{\mathbf{b}} + \tilde{\mathbf{p}}_i^T \hat{\mathbf{e}} + \tilde{\mathbf{v}}_i^T \mathbf{z}$ , where  $\tilde{\mathbf{v}}_i = \mathbf{v}_i - \mathbf{G}(\tilde{\mathbf{x}}_i)$ . Obviously, when  $\mathbf{z} = \mathbf{0}$ ,

$$\hat{\eta}(\mathbf{z}) = \arg \max_{\eta(\mathbf{z})} \ell(\mathbf{Y}; \eta(\mathbf{z})).$$

Then the following equation follows from a Taylor's expansion

$$\begin{aligned} 0 = \frac{\partial \ell(\hat{\eta}(\mathbf{z}))}{\partial \mathbf{z}} \Big|_{\mathbf{z}=\mathbf{0}} &= \sum_{i=1}^N \dot{\ell}_{i, \hat{\eta}_i}(y_i; \hat{\eta}_i) \tilde{\mathbf{v}}_i \\ &= \sum_{i=1}^N \dot{\ell}_{i, \eta_i^*}(y_i; \eta_i^*) \tilde{\mathbf{v}}_i + \sum_{i=1}^N \ddot{\ell}_{i, \eta_i^*}(y_i; \eta_i^*) \tilde{\mathbf{v}}_i (\hat{\eta}_i - \eta_i^*) + o_p(1), \end{aligned}$$

Applying Lemma 2 and Lemma 3, the second term on the right hand side of the above equation can be rewritten as

$$\frac{1}{N} \sum_{i=1}^N \ddot{\ell}_{i, \eta_i^*}(y_i; \eta_i^*) \tilde{\mathbf{v}}_i (\hat{\eta}_i - \eta_i^*) = \frac{1}{N} \sum_{i=1}^N \ddot{\ell}_{i, \eta_i^*}(y_i; \eta_i^*) \tilde{\mathbf{v}}_i \tilde{\mathbf{v}}_i^T (\hat{\mathbf{b}} - \mathbf{b}^*) + o_p(N^{-1/2}).$$

Then we have

$$(\hat{\mathbf{b}} - \mathbf{b}^*) = - \left[ \frac{1}{N} \sum_{i=1}^N \ddot{\ell}_{i, \eta_i^*}(y_i; \eta_i^*) \tilde{\mathbf{v}}_i \tilde{\mathbf{v}}_i^T \right]^{-1} \left[ \frac{1}{N} \sum_{i=1}^N \dot{\ell}_{i, \eta_i^*}(y_i; \eta_i^*) \tilde{\mathbf{v}}_i \right] + o_p(N^{-1/2}).$$

Therefore, by Central Limit Theory and Slutsky's Theorem, we have

$$\sqrt{N}(\hat{\mathbf{b}} - \mathbf{b}^*) \rightarrow N(\mathbf{0}, \mathbf{\Omega}_1^{-1} \mathbf{\Omega}_2 \mathbf{\Omega}_1^{-1}),$$

where  $\mathbf{\Omega}_1$  and  $\mathbf{\Omega}_2$  are defined in Lemma 2.  $\square$

**Proof of Theorem 2.3.** Similar to [2], for any  $a \in [1, 2]$ , we have

$$\begin{aligned}
\|\hat{\beta}_a(t) - \beta_a^*\| &= \left\| \sum_{l=1}^{K_x} \hat{e}_{al} \hat{\phi}_{al} - \sum_{l=1}^{\infty} e_{al}^* \phi_{al} \right\|^2 \\
&\leq 2 \left\| \sum_{l=1}^{K_x} \hat{e}_{al} \hat{\phi}_{al} - \sum_{l=1}^{K_x} e_{al}^* \phi_{al} \right\|^2 + 2 \left\| \sum_{l=K_x+1}^{\infty} e_{al}^* \phi_{al} \right\|^2 \\
&\leq 4 \left\| \sum_{l=1}^{K_x} (\hat{e}_{al} - e_{al}^*) \hat{\phi}_{al} \right\|^2 + 4 \left\| \sum_{l=1}^{K_x} e_{al}^* (\hat{\phi}_{al} - \phi_{al}) \right\|^2 + 2 \sum_{l=K_x+1}^{\infty} e_{al}^{*2} \\
&\leq 4 \|\hat{\mathbf{e}}_a - \mathbf{e}_a^*\|^2 + 8K_x \sum_{l=1}^{K_x} e_{al}^{*2} \|\hat{\phi}_{al} - \phi_{al}\|^2 + 2 \sum_{l=K_x+1}^{\infty} e_{al}^{*2}.
\end{aligned}$$

Note that

$$\sum_{l=K_x+1}^{\infty} e_{al}^{*2} \leq C \sum_{l=K_x+1}^{\infty} l^{-2\gamma} = O(K_x^{-(2\gamma-1)}) = O(N^{-(2\gamma-1)/(\alpha+2\gamma)}), \quad (\text{S3})$$

and by  $\|\hat{\phi}_{al} - \phi_{al}\|^2 = O_p(N^{-1}l^2)$ , we have

$$8K_x \sum_{l=1}^{K_x} e_{al}^{*2} \|\hat{\phi}_{al} - \phi_{al}\|^2 \leq O_p(N^{-1}K_x) = o_p(N^{-(2\gamma-1)/(\alpha+2\gamma)}). \quad (\text{S4})$$

In addition, from Lemma 3 we have  $\|\hat{\mathbf{e}} - \mathbf{e}^*\|^2 = O_p(N^{-(2\gamma-1)/(\alpha+2\gamma)})$ , then Theorem 2.3 holds by combining this with equations (S3) and (S4).  $\square$

**Proof of Corollary 2.4.** Let  $\hat{\eta}_i = \mathbf{v}_i^T \hat{\mathbf{b}} + \int_0^1 \tilde{\mathbf{x}}_i(t) \hat{\beta}(t) dt$ , where  $\hat{\mathbf{b}}$  and  $\hat{\beta}(t)$  are obtained from our proposed estimation procedure. Then, we have

$$\begin{aligned}
\hat{\eta}_i - \eta_i^* &= \mathbf{v}_i^T \hat{\mathbf{b}} + \int_0^1 \tilde{\mathbf{x}}_i(t) \hat{\beta}(t) dt - [\mathbf{v}_i^T \mathbf{b}^* + \int_0^1 \tilde{\mathbf{x}}_i(t) \beta^*(t) dt] \\
&= \mathbf{v}_i^T (\hat{\mathbf{b}} - \mathbf{b}^*) + \sum_{a=1}^2 \sum_{l=1}^{\infty} \langle \tilde{\mathbf{x}}_{ai}, \phi_{al} \rangle \langle \hat{\beta}_a, \hat{\phi}_{al} \rangle - \sum_{a=1}^2 \sum_{l=1}^{\infty} \langle \tilde{\mathbf{x}}_{ai}, \phi_{al} \rangle \langle \beta_a^*, \phi_{al} \rangle \\
&= \mathbf{v}_i^T (\hat{\mathbf{b}} - \mathbf{b}^*) + \sum_{a=1}^2 \sum_{l=1}^{\infty} \langle \tilde{\mathbf{x}}_{ai}, \phi_{al} \rangle (\hat{e}_{al} - e_{al}^*) \\
&= I_5 + I_6,
\end{aligned}$$

where  $\hat{e}_{al} = \langle \hat{\beta}_a, \hat{\phi}_{al} \rangle$ ,  $e_{al}^* = \langle \beta_a^*, \phi_{al} \rangle$ ,  $I_5 = \mathbf{v}_i^T(\hat{\mathbf{b}} - \mathbf{b}^*)$  and  $I_6 = \sum_{a=1}^2 \sum_{l=1}^{\infty} \langle \tilde{\mathbf{x}}_{ai}, \phi_{al} \rangle (\hat{e}_{al} - e_{al}^*) = \sum_{a=1}^2 \sum_{l=1}^{\infty} p_{ail}(\hat{e}_{al} - e_{al}^*)$ .

Given Theorem 2.2, the fact that  $\|\hat{\mathbf{b}} - \mathbf{b}^*\| = O_p(N^{-1/2})$  holds. Then under Assumption (A4) we have  $E\|I_5\|^2 = \|\hat{\mathbf{b}} - \mathbf{b}^*\|^2 E\mathbf{v}_i^2 = O_p(N^{-1})$ .

Since  $\langle \tilde{\mathbf{x}}_{ai}, \phi_{al} \rangle$  are uncorrelated random variables with zero mean and variance  $\lambda_{al}$ , and by Lemma 3 we have  $\|\hat{\mathbf{e}} - \mathbf{e}^*\|^2 = O_p(N^{-(2\gamma-1)/(\alpha+2\gamma)})$ . Then under Assumption (A2), we have

$$E(\|I_6\|^2) = \sum_{a=1}^2 \sum_{l=1}^{\infty} \lambda_{al} \|\hat{e}_{al} - e_{al}^*\|^2 \leq 2O_p(N^{\frac{2\gamma-1}{\alpha+2\gamma}}) C \sum_{l=1}^{\infty} l^{-\alpha} = O_p(N^{\frac{2\gamma-1}{\alpha+2\gamma}}).$$

Thus

$$\hat{\eta}_i - \eta^* = I_5 + I_6 = O_p(N^{-1/2}) + O_p(N^{-(2\gamma-1)/(\alpha+2\gamma)}) = O_p(N^{-1/2}).$$

Note that the functional logistic regression model is a special case of model (11) and (12) with a logistic link function, i.e.  $\eta_i = \text{logit}(\pi_i)$ . Since the inverse link function  $h^{-1}(\eta_i)$  is continuous and differentiable in  $\eta_i$ , then  $h^{-1}(\hat{\eta}_i) - h^{-1}(\eta_i^*) = O_p(N^{-1/2})$  holds, which indicate that  $\hat{\pi}_i - \pi_i^* = O_p(N^{-1/2})$ .  $\square$

**Proof of Theorem 2.5.**  $\hat{\theta}_x$  is the MLE of the second level model obtained through conditional models described in Section 2.2, then under Assumptions (A7)-(A9), the theorem follows from [10] immediately, to save space, we omit the proof here.  $\square$

## References

- [1] L. Ting and Z. Zhu, *Inference for generalized partial functional linear regression*, Statist. Sinica. 30(2020), pp. 1379–1397.
- [2] H. Shin, *Partial functional linear regression*, J. Statist. Plann. Inference 139(2009), pp. 3405–3418.
- [3] T. T. Cai, P. Hall and others, *Prediction in functional linear regression*, Ann. Statist. 34(2006), pp. 2159–2179.
- [4] P. Hall, J. L. Horowitz and others, *Methodology and convergence rates for functional linear regression*, Ann. Statist. 35(2007), pp. 70–91.

- [5] A. W. Van der Vaart, *Asymptotic Statistics*, Cambridge university press, Cambridge, 2000.
- [6] C. J. Geyer, *On the convergence of Monte Carlo maximum likelihood calculations*, J. R. Stat. Soc. Ser. B. Stat. Methodol. 56 (1994), pp. 261–274.
- [7] D. Pollard, *Asymptotics for least absolute deviation regression estimators*, Econometric Theory 7 (1991), pp. 186–199.
- [8] R. Cao, J. Du, J. Zhou and T. Xie, *FPCA-based estimation for generalized functional partially linear models*, Statist. Papers 61 (2020), pp. 2715–2735.
- [9] L. Wang, X. Liu, H. Liang and R.J. Carroll, *Estimation and variable selection for generalized additive partial linear models*, Ann. Statist. 39 (2011), pp. 1827–1851.
- [10] H. White, *Estimation, inference and specification analysis*, Cambridge university press, Cambridge, 1996.
