# Supplementary material
Source: publisher figshare collection journal article supplement (https://tandf.figshare.com/articles/dataset/_/18394223)
Supplement: Supplementary file 2 [file 1]

```
#####
#####
# An R example of curve generation, registration and
classification for JCRC method.
#####
#####
```

```
##### install and load packages #####
pck <- c("here", "refund", "mgcv", "doParallel")
install.packages(pck)
mypackages<-lapply(pck, require, character.only = TRUE)
# set the path to the current working directory
path = paste(here(), "jcrc", sep = "/")
# set the savepath to save the data generated in this example
savepath = paste(here(), "data", sep = "/")
```

```
# generate true mean curves
m<-100 # sampling frequency
t <- seq(0, 1, length = m + 2)[2:(m + 1)]; # equidistant points
x11=0.6*dnorm(t)+0.4*dbeta(t, 2, 3); x21=sin(2*pi*t+0.5);
x12=0.5*dnorm(t, mean = 0.5, sd=0.5)+0.5*dbeta(t, 3, 4);
x22=sin(2*pi*t^1.2+0.5);
N0<-matrix(0, nrow = m, ncol = 3); Ab0<-matrix(0, nrow = m,
ncol = 3);
N0[, 1] <- t; N0[, 2] <- x11; N0[, 3] <- x21; Ab0[, 1] <- t; Ab0[, 2]
<- x12; Ab0[, 3] <- x22;
# save the true curves, k represents the number of simulation
runs
k=1
true_curve<-list(x1=x11, y1=x21, x2=x12, y2=x22)
save(true_curve, file=paste(savepath, paste("true_curve", as
.character(k), ".Rda"), sep = "/"))
```

```
# B-spline representation of the true mean curves
lenkt<-8 # number of basis functions
kts<-seq(0, 1, length=lenkt)[2:(lenkt-1)]
basis_fct<-make_basis_fct(kts = kts, intercept = TRUE) #
basis function
r<-basis_fct(t) # extract basis functions evaluated at t

# Extract the basis coefficients
bcc1<-basis_coe_class(r, N0[, 2], Ab0[, 2], scale=1);
```

```

beta_at0=bcc1[[1]];
beta_at1=bcc1[[2]];
beta_at2=bcc1[[3]];
bcc2<-basis_coe_class(r, N0[, 3], Ab0[, 3], scale=1);
beta_bt0=bcc2[[1]];
beta_bt1=bcc2[[3]];
beta_bt2=bcc2[[3]];

# Generate the warped curves
n<-120 # sample size
# generate Matern covariance function with parameter
amp_par_t
amp_par_t <- c(100, 0.3, 3) # parameter used to create the
Matern covariance function
amp_cov1 <- make_cov_fct(Matern, noise = TRUE) # Matern
covariance function

# generate warping function
tw <- seq(0, 1, length = 4) # anchor points for the warping
function
warp_fct <- make_warp_fct(type = 'smooth', tw = tw) #
type="smooth", Hyman filtered
warp_cov_true1 <- matrix(c(10, 4, 4, 8), 2, 2)
warp_cov_true2 <- matrix(c(10, 8, 8, 15), 2, 2)

# generate the warped curves
sigma<-0.02
sigma_w<-sigma/4
sigma_r<-sigma

# parallel computing
#no_cores=detectCores()
#cl<-makeCluster(no_cores-1)
#registerDoParallel(cl)
#foreach (k = 1:100) %dopar% {
w_t1<-replicate(n/2, (t(chol(warp_cov_true1))*rnorm(2, sd=s
igma_w))[, 1])
w_t2<-replicate(n/2, (t(chol(warp_cov_true2))*rnorm(2, sd=s
igma_w))[, 1])

amp1 <- lapply(1:(n/2), function(i) sigma_r *
t(chol(amp_cov1(t, amp_par_t))) %*% rnorm(m))
beta_ran1 <- lapply(1:(n/2), function(i) basis_coe(r,
amp1[[i]]))
amp2 <- lapply(1:(n/2), function(i) sigma_r *

```

```

t(chol(amp_cov1(t, amp_par_t))) %%% rnorm(m))
beta_ran2 <- lapply(1:(n/2), function(i) basis_coe(r,
amp2[[i]]))
amp3 <- lapply(1:(n/2), function(i) sigma_r *
t(chol(amp_cov1(t, amp_par_t))) %%% rnorm(m))
beta_ran3 <- lapply(1:(n/2), function(i) basis_coe(r,
amp3[[i]]))
amp4 <- lapply(1:(n/2), function(i) sigma_r *
t(chol(amp_cov1(t, amp_par_t))) %%% rnorm(m))
beta_ran4 <- lapply(1:(n/2), function(i) basis_coe(r,
amp4[[i]]))
ya1 <- lapply(1:(n/2), function(i) {(basis_fct(warp_fct(0,
w_t1[, i], t)) %%% (beta_at0 + beta_at1 + beta_ran1[[i]])
+ amp1[[i]] + rnorm(m, sd =
sigma))[, 1]})
ya2 <- lapply(1:(n/2), function(i) {(basis_fct(warp_fct(0,
w_t2[, i], t)) %%% (beta_at0 + beta_at2 + beta_ran2[[i]])
+ amp2[[i]] + rnorm(m, sd =
sigma))[, 1]})
yb1 <- lapply(1:(n/2), function(i) {(basis_fct(warp_fct(0,
w_t1[, i], t)) %%% (beta_bt0 + beta_bt1 + beta_ran3[[i]])
+ amp3[[i]] + rnorm(m, sd =
sigma))[, 1]})
yb2 <- lapply(1:(n/2), function(i) {(basis_fct(warp_fct(0,
w_t2[, i], t)) %%% (beta_bt0 + beta_bt2 + beta_ran4[[i]])
+ amp4[[i]] + rnorm(m, sd =
sigma))[, 1]})
tya1 <- lapply(1:(n/2), function(i) {r %%% (beta_at0 +
beta_at1 + beta_ran1[[i]])})
tya2 <- lapply(1:(n/2), function(i) {r %%% (beta_at0 +
beta_at2 + beta_ran2[[i]])})
tyb1 <- lapply(1:(n/2), function(i) {r %%% (beta_bt0 +
beta_bt1 + beta_ran3[[i]])})
tyb2 <- lapply(1:(n/2), function(i) {r %%% (beta_bt0 +
beta_bt2 + beta_ran4[[i]])})

ya = append(ya1, ya2)
yb = append(yb1, yb2)
data_mat=append(ya, yb)
save(data_mat, file=paste(savepath, paste("data_mat", as.character(k), ".Rda"), sep = "/"))

# test data
n0<- n/4

```

```

ind = 1:n0
test_data = list()
t1 <- lapply(1:(2*n0), function(x) t)
for (i in ind){
  test_data[[i]] = list(t0 = t1[[i]], y1 = ya1[[i]], y2 =
yb1[[i]])
  test_data[[i + length(ind)]] = list(t0 = t1[[i]], y1 =
ya2[[i]], y2 = yb2[[i]])
}
save(test_data, file=paste(savepath, paste("test_data", as.c
haracter(k), ".Rda"), sep = "/"))

# training data
n1 <- n - 2*n0
t2 <- lapply(1:n1, function(x) t)
ya_tr = append(ya1[(n0+1):(n/2)], ya2[(n0+1):(n/2)])
yb_tr = append(yb1[(n0+1):(n/2)], yb2[(n0+1):(n/2)])
train_data=append(ya_tr, yb_tr)
save(train_data, file=paste(savepath, paste("train_data", as
.character(k), ".Rda"), sep = "/"))

#}
#stopCluster(cl)

##### generate the binary outcomes for the model
#####
# true value of the functional coefficients and the scalar
coefficients
betat1 <- cos(2*pi*t); betat2 <- 2*(t-1)^2;
b0 = 0.1; b1 = -0.5;

aa1 <- 1; aa2 <- 2;
bb1 <- 0.5; bb2 <- 1.5;

# response outcomes
Y <- resp_gene(true_data, t, betat1, betat2, n, b0, b1, b2,
aa1, aa2, bb1, bb2, check = "F")
save(Y, file=paste(savepath, paste("Y_s.Rda"), sep = "/"))

#### curve registration #####
t2 <- lapply(1:n, function(x) t)
warp_cov <- make_cov_fct(unstr_cov, noise = FALSE, param =
c(2, 2, 0))

```

```

Index = Y[[5]]
K = list(ind1 = which(Index==1), ind2 = which(Index==0)) #
class labels
ya = data_mat[1:n] # x-coordinates
yb = data_mat[(n+1):(2*n)] # y-coordinates
res <- pavpop_fixrandwarp(ya, yb, t2, K, basis_fct = basis_fct,
warp_fct = warp_fct,
                        amp_cov = amp_cov1, warp_cov =
warp_cov) # curve registration procedure
Aligned <- Aligned_curves(ya, yb, t2, K, res)
save(Aligned, file=paste(savepath, paste("Aligned", as.character(k), ".Rda"), sep = "/")) # k is the number of repetition

## estimations of the scalar coefficients and the functional
coefficients ###
funcs_tr <- list(rbind(Aligned[[1]], Aligned[[3]]),
rbind(Aligned[[2]], Aligned[[4]]))
covt <- as.matrix(Y$x1)
fit.pat <- fpfr(Y$Res, covt, funcs = funcs_tr, kz = 35, kb
= 35,
              family=binomial(link = "logit"), method =
"REML", smooth.cov=FALSE)
scl_est <- fit.pat$beta.covariates
fun_est <- fit.pat$BetaHat

##### comparison with other methods #####
load(paste(savepath, paste("train_data", as.character(k), ".
Rda"), sep = "/"))
Index_train = Y[[k]][[5]][1:(2*n0)]
K = list(ind1 = which(Index_train==1), ind2 =
which(Index_train==0))
#cat(length(K$ind1), length(K$ind2))
ya_tr = data_mat[1:(2*n0)]
yb_tr = data_mat[(2*n0+1):(4*n0)]
res <- pavpop_fixrandwarp(ya_tr, yb_tr, t2, K, basis_fct =
basis_fct, warp_fct = warp_fct,
                        amp_cov = amp_cov1, warp_cov =
warp_cov, iter = c(6, 6),
                        like_optim_control = list(upper =
rep(Inf, 6),
                                                lower
=
c(1e-2, 1e-2, 0.5001, 1e-2, 1e-2, 1e-2)))
Ay_train <- Aligned_curves(ya_tr, yb_tr, t2, K, res)

```

```
save(Ay_train, file=paste(savepath, paste("Ay_train", as.character(k), ".Rda"), sep = "/"))
```

```
load(paste(savepath, paste("test_data", as.character(k), ".Rda"), sep = "/"))
```

```
Index_test = Y[[k]][[5]][(2*n0+1):(4*n0)]
```

```
w_ran_tel <- test_wran(warp_fct, res, test_data,
length(Index_test), basis_fct, amp_cov1, axis = '2D')
```

```
save(w_ran_tel, file=paste(savepath, paste("w_ran_tel", as.character(k), ".Rda"), sep = "/"))
```

```
y <- Y[[k]]
```

```
y_tr <- y$Res[1:(2*n0)]
```

```
y_tr <- c(y_tr[K[[1]]], y_tr[K[[2]]])
```

```
covt1 <- y$x1[1:(2*n0)]
```

```
covt1 <- c(covt1[K[[1]]], covt1[K[[2]]])
```

```
# LLR
```

```
# use scalar variables only
```

```
Ini <- clasf_scal(n0, y)
```

```
Cla_scal <- Ini$C1
```

```
# JCRC
```

```
# use both scalar variable and functional variable
```

```
fucoef2 <- func_coef(Ay_train, covat = as.matrix(covt1), kz,
kb, d = 'Aligned')
```

```
Ini3 <- classi_fs(y, n0, data_mat, warp_fct, basis_fct, initial
= 1, p= 0, iteration = 5, kz = kz, kb = kb, t2, res, w_ran_tel,
fucoef2)
```

```
Cla_fs <- Ini3$C2
```

```
# JCRC-f
```

```
# use functional variable only
```

```
fucoef1 <- func_coef(Ay_train, covat = NULL, kz, kb, d =
'Aligned')
```

```
Ini2 <- clasf_func2(y, n0, dat, warp_fct, basis_fct, p=0,
iteration = 5, kz, kb, t2, res, w_ran_tel, fucoef1)
```

```
Cla_func <- Ini2$C2
```

```
##### functions required in the
main codes #####
##### some of them are copied from R package "pavpop4.0"
(Raket 2016) #####
##### and are changed to fit our approach #####
##### @reference: L. L. Raket (2016), "pavpop Version 0.10,"
available at http://github.com/larslau/pavpop/. ####
```

```
##### make_basis_fct() #####
make_basis_fct <- function(kts = NULL, df = NULL, type =
'B-spline', intercept = FALSE, control = list()) {
  # Match type
  types <- c('B-spline', 'increasing', 'intercept',
'Fourier', 'wavelet')
  type <- types[pmatch(type, types)]
```

```
  if (is.na(type)) stop('Invalid type of basis.')
```

```
  # Check that kts or df is supplied if type is different from
'intercept'
```

```
  if (type != 'intercept' & is.null(kts) & is.null(df))
stop('You must supply either list of knots or degrees of
freedom.')
```

```
  # Control boundary
```

```
  if (!is.null(control$boundary)) {
    boundary = control$boundary
  } else {
```

```
    # If kts is supplied, boundary is given by extending the
knot list
```

```
    # one "step-length" under the assumption of equidistant
knots
```

```
    if (!is.null(kts)) {
      boundary <- range(kts) + diff(range(kts)) * c(-1 /
(length(kts) - 1), 1 / (length(kts) - 1))
```

```
    } else if (type != 'intercept') {
      # No boundary supplied, no knots
      warning('No boundary knots or evaluation knots supplied,
assuming observation points are in (0, 1)')
```

```
      boundary <- c(0, 1)
```

```
    }
```

```
  }
```

```

# Control constraints
if (is.null(control$constraints) & type != 'increasing')
{
  constraints <- 'none'
} else {
  constraints <- 'positive'
}

#
# B-spline basis
#
if (type == 'B-spline') {
  # Extract order of B-spline basis
  if (is.null(control$order)) {
    order <- 4
  } else {
    order <- control$order
  }
  if (is.null(kts)){
    kts <- seq(boundary[1], boundary[2], length = df - order
+ (3L - intercept))
    kts <- head(tail(kts, -1), -1)
  }
  Aknots <- sort(c(rep(boundary, order), kts))

  # Should sparse matrices be used?
  if (is.null(control$sparse)) {
    sparse <- FALSE
  } else {
    sparse <- control$sparse
  }

  # Basis function to return
  b <- function(t, deriv = FALSE) {
    basis <- splines::splineDesign(Aknots, t, ord = order,
derivs = rep(0, length(t)), outer.ok = TRUE, sparse = sparse)
    if (!intercept) basis <- basis[, -1]
    return(basis[])
  }
  attr(b, 'boundary') <- boundary
}

#

```



```

# Increasing spline basis
#
if (type == 'increasing') {
  # Extract order of I-spline basis
  if (is.null(control$order)) {
    order <- 3
  } else {
    order <- control$order
  }

  # Set boundary and B-spline knots (for derivative)
  boundary <- range(kts)
  Aknots <- sort(c(rep(boundary, order - 1), kts))

  b <- function(t, deriv = FALSE) {
    if (!deriv) {
      basis <- ispline(t, knots = kts, d = order)
    } else {
      basis <- t(c(order / 1:(order - 1), rep(1, length(kts)
-      order),      order      /      (order      -      1):1)      *
t(splines::splineDesign(Aknots, t, ord = order, derivs =
rep(0, length(t)), outer.ok = TRUE) * (length(kts) - 1) /
diff(range(kts))))
    }
    if (intercept) {
      basis <- cbind(!deriv, matrix(basis, nrow =
length(t)))
    }
    dims <- dim(basis)
    basis <- as.numeric(basis)
    dim(basis) <- dims
    return(basis)
  }
}

#
# Only intercept
#
if (type == 'intercept') {
  b <- function(t, deriv = FALSE) {
    t[] <- ifelse(deriv, 0, 1)
    dim(t) <- c(length(t), 1)
    return(t)
  }
}

```

```

    attr(b, 'df') <- 1
    attr(b, 'intercept') <- TRUE

    return(b)
  }

  attr(b, 'df') <- length(kts) + order - 1 - 1 * (type ==
'increasing') + intercept
  attr(b, 'intercept') <- intercept
  attr(b, 'constraints') <- constraints
  return(b)
}

##### ispline() #####
ispline <- function (t, knots, d) {
  if (is.null(knots) || any(is.na(knots)) || any(diff(knots)
== 0) || length(knots) <= 2)
    return(t)
  m <- length(knots)
  n <- length(t)
  interval <- findInterval(t, knots, all.inside = TRUE)
  M <- sapply(sequence(m - 1), `==`, interval)
  for (i in 2:(d + 1)) {
    tik <- c(knots[-1], rep(knots[m], i - 2))
    ti <- c(rep(knots[1], i - 2), knots[-m])
    M <- M %%% diag(1 / (tik - ti))
    Dx <- Dt <- array(0, dim = c(m + i - 3, m + i - 2))
    Dx[1L + 0L:(m + i - 4L) * (m + i - 2L)] <- -1
    Dx[1L:(m + i - 3L) * (m + i - 2L)] <- 1
    Dt[1L + 0L:(m + i - 4L) * (m + i - 2L)] <- tik
    Dt[1L:(m + i - 3L) * (m + i - 2L)] <- -ti
    M <- (M * t) %%% Dx + M %%% Dt
  }
  M <- M[, -1, drop = FALSE]
  S <- array(1, dim = rep(NCOL(M), 2))
  S[upper.tri(S)] <- 0
  I <- M %%% S
  I[t > max(knots), ] <- 1
  return(I)
}

```

```
##### basis_coe_class() #####
basis_coe_class <- function(r, x1, x2, scale = 1){
  b1<- basis_coe(r, x1)
  b2<- basis_coe(r, x2)
  beta_t0 = (b1 + b2)/2
  beta_t1 = (b1 - beta_t0) - mean(b1 - beta_t0)
  beta_t2 = (b2 - beta_t0) - mean(b2 - beta_t0)
  return(list(beta_t0 = beta_t0, beta_t1 = beta_t1/scale,
beta_t2 = beta_t2/scale))
}
```

```
##### basis_coe() #####
basis_coe <- function(r, x){
  A = as.matrix(r)
  B = as.matrix(x)
  asvd = svd(A)
  adiag = diag(1/asvd$d)
  return(asvd$v %*% adiag %*% t(asvd$u) %*% B)
#solution = asvd$v %*% adiag %*% t(asvd$u) %*% B
#check = A %*% solution
}
```

```
##### make_cov_fct() #####
make_cov_fct <- function(cov_fct, noise = TRUE, param = NULL,
ns = NULL, ...) {
  # Check ns related things
  if (!is.null(ns)) {
    if (is.null(ns$knots)) stop('ns must be a list with the
argument knots.')
    if (ns$knots < 2) {
      warning('number of knots should at least be 2, ignoring
argument.')
```

```
      ns <- NULL
    }
    if (is.null(ns$range)) {
      warning('No range specified using c(0, 1).')
```

```
      ns$range <- c(0, 1)
    }
  }
}
```

```

if (!is.null(attr(cov_fct, 'discrete')))) {
  # Discrete covariances
  if (attr(cov_fct, 'discrete')) {
    if (noise) {
      f <- function(t, param) cov_fct(t, param) + id_cov(t)
    } else {
      f <- cov_fct
    }
  } else {
    stop('attribute \'discrete\' should be NULL for
non-discrete covariances.')
  }
} else {
  # Non-discrete covariances
  if (attr(cov_fct, 'stationary')) {
    # Faster construction of stationary covariances
    if (is.null(ns)) {
      # stationary covariance, fill rows and columns
simultaneously
      f <- function (t, param) {
        m <- length(t)
        S <- diag(cov_fct(0, param, ...) + noise, m)
        if (m > 1) {
          for (i in 1:(m - 1)) {
            S[i, (i + 1):m] <- S[(i + 1):m, i] <-
cov_fct(abs(t[i] - t[(1 + i):m]), param, ...)
          }
        }
        return(S)
      }
    } else {
      # Stationary covariance made non-stationary
      knots <- ns$knots
      fixed <- ifelse(!is.null(ns$fixed), ns$fixed,
max(knots))
      m_ns <- knots - length(fixed)
      f <- function (t, param) {
        ns_param <- rep(1, length = knots)
        ns_param[-fixed] <- param[1:m_ns]
        ns <- spline(seq(ns$range[1], ns$range[2], length =
knots), ns_param, xout = t)$y
        m <- length(t)
        S <- diag(cov_fct(0, param[-(1:m_ns)], ...), m)

```

```

        if (m > 1) {
          for (i in 1:(m - 1)) {
            S[i, (i + 1):m] <- S[(i + 1):m, i] <-
cov_fct(abs(t[i] - t[(1 + i):m]), param[-(1:m_ns)], ...)
          }
        }
        S <- ns %**% t(ns) * S
        if (noise) diag(S) <- diag(S) + 1
        return(S)
      }
    }
  } else {
    # Non-stationary covariance, fill in all entries
separately
    if (is.null(ns)) {
      f <- function (t, param) {
        m <- length(t)
        S <- matrix(NA, m, m)
        for (i in 1:m) {
          for (j in i:m) {
            S[i, j] <- S[j, i] <- cov_fct(c(t[i], t[j]),
param, ...)
          }
        }
        if (noise) diag(S) <- diag(S) + 1
        return(S)
      }
    } else {
      knots <- ns$knots
      fixed <- ifelse(!is.null(ns$fixed), ns$fixed,
max(knots))
      m_ns <- knots - length(fixed)
      f <- function (t, param) {
        ns_param <- rep(1, length = knots)
        ns_param[-fixed] <- param[1:m_ns]
        ns <- spline(seq(ns$range[1], ns$range[2], length =
knots), ns_param, xout = t)$y

        m <- length(t)
        S <- matrix(NA, m, m)
        for (i in 1:m) {
          for (j in i:m) {
            S[i, j] <- S[j, i] <- ns[i] * ns[j] *
cov_fct(c(t[i], t[j]), param[-(1:m_ns)], ...)

```

```

    }
  }
  if (noise) diag(S) <- diag(S) + 1
  return(S)
}
}
}
}
if (is.null(param)) param <- formal s(cov_fct)$param
attr(f, 'param') <- param

# Set type
attr(f, 'type') <- attr(cov_fct, 'type')
if (attr(f, 'type') == 'Brownian') {
  args <- list(...)
  exist <- "type" %in% names(args)
  if (exist) {
    attr(f, 'type') <- attr(cov_fct, 'type') <-
paste(attr(cov_fct, 'type'), args$type)
  } else {
    attr(f, 'type') <- attr(cov_fct, 'type') <- 'Brownian
motion'
  }
}
# Set solve method
attr(f, 'inv_cov_fct') <- attr(cov_fct, 'inv_cov_fct')
# Set the scale parameter
attr(f, 'scale') <-
ifelse(any(names(formal s(cov_fct)$param) == 'scale'),
which(names(formal s(cov_fct)$param) == 'scale') - 1, NA)
# Include covariance function evaluated with additional
arguments
eval_cov_fct <- function(t, param) cov_fct(t, param, ...)
attributes(eval_cov_fct) <- attributes(cov_fct)
attr(f, 'cov_fct') <- eval_cov_fct
attr(f, 'noise') <- noise
# If the covariance has been made non-stationary, modify
if (!is.null(ns)) {
  fixed <- ifelse(!is.null(ns$fixed), ns$fixed,
max(knots))
  m_ns <- knots - length(fixed)

  attr(f, 'param') <- c(local_scale = rep(1, m_ns), param)
  ns_cov_fct <- function(t, param) {

```

```

    ns_param <- rep(1, length = knots)
    ns_param[-fixed] <- param[1:m_ns]
    prod(spline(seq(ns$range[1], ns$range[2], length =
ns$knots), ns_param, xout = t)$y) *
    cov_fct(abs(diff(t)), param[-(1:m_ns)])
  }
  attr(ns_cov_fct, 'stationary') <- FALSE
  attr(f, 'cov_fct') <- ns_cov_fct
}
return(f)
}

```

```

##### Matern covariance function#####
Matern <- function(d, param = c(scale = 1, range = 1,
smoothness = 2)) {
  scale <- param[1]
  range <- param[2]
  smoothness <- param[3]
  if (any(d < 0))
    stop("distance argument must be nonnegative")
  d <- d / range
  d[d == 0] <- 1e-10
  con <- (2^(smoothness - 1)) * gamma(smoothness)
  con <- 1 / con
  return(scale * con * (d^smoothness) * besselK(d,
smoothness))
}
attr(Matern, 'stationary') <- TRUE
attr(Matern, 'type') <- 'Matern'

```

```

##### make_warp_fct() #####
make_warp_fct <- function(type = c('shift', 'linear',
'piecewise-linear', 'smooth'), tw = NULL, control =
list(wleft = 'fixed', wright = 'fixed')) {
  # Match type argument
  if (length(type) > 1) type <- type[1]
  types <- c('shift', 'linear', 'piecewise-linear',
'smooth')
  type <- types[pmatch(type, types)]
  if (is.null(tw)) tw <- NA

```

```

# If boundary control is missing, assume fixed
if (is.null(control$wleft)) control$wleft <- 'fixed'
if (is.null(control$wright)) control$wright <- 'fixed'

if (type == 'shift') {
  v <- function(w, t, w_grad = FALSE) {
    if (!w_grad) {
      return(w + t)
    } else {
      return(matrix(1, length(t), 1))
    }
  }
  attr(v, 'mw') <- 1
} else if (type == 'linear') {
  v <- function(w, t, w_grad = FALSE) {
    if (!w_grad) {
      return(w[1] + (w[2] + 1) * t)
    } else {
      dv <- matrix(1, length(t), 2)
      dv[, 2] <- t
      return(dv)
    }
  }
  attr(v, 'mw') <- 2
} else if (type == 'piecewise-linear') {
  if (any(is.na(tw))) stop('all anchor points tw should be
supplied for type \'piecewise-linear\'')
  mw <- length(tw)
  v <- function(w1, w2, t, w_grad = FALSE) {
    w <- w1 + w2
    if (!w_grad) {
      vt <- t + approx(tw, c(ifelse(control$wleft == 'fixed',
0, w[1]),
                                w,
                                ifelse(control$wright == 'fixed',
0, w[length(w)])),
                        xout = t, rule = 2)$y
      return(vt)
    } else {
      # Derivative of warp function
      # Note: does not depend on w
      dv <- apply(cbind(tw[1:(mw - 2)], tw[2:(mw - 1)]),

```



```

tw[3:mw]), 1, function(x) {
  a <- rep(0, length(t))
  a[t > x[1] & t < x[2]] <- ((t - x[1]) / (x[2] - x[1]))[t >
x[1] & t < x[2]]
  a[t >= x[2] & t < x[3]] <- (1 - ((t - x[2]) / (x[3]
- x[2]))) [t >= x[2] & t < x[3]]
  return(a)
})
  if (control$wleft != 'fixed') dv[t < tw[2], 1] <- 1
  if (control$wright != 'fixed') dv[t > tw[mw - 1], mw
- 2] <- 1
  return(dv)
}
}
attr(v, 'mw') <- mw - 2
} else if (type == 'smooth') {
  if (any(is.na(tw))) stop('all anchor points tw should be
supplied for type \'smooth\'')
  mw <- length(tw)
  # Hyman spline warping function
  v <- function(w1, w2, t, w_grad = FALSE) {
    w <- w1 + w2
    y <- tw + c(ifelse(control$wleft == 'fixed', 0, w[1]),
w, ifelse(control$wright == 'fixed', 0, w[length(w)]))
    if (!all(diff(y) > 0)) {
      w <- make_homeo(w, tw, epsilon = 0.2)
      y <- tw + c(ifelse(control$wleft == 'fixed', 0, w[1]),
w, ifelse(control$wright == 'fixed', 0, w[length(w)]))
    }
    if (!w_grad){
      return(spline(tw, y, xout = t, method = 'hyman')$y)
    } else {
      # Derivative of warp function
      # Finite difference, could we do better?
      epsilon <- 1e-5
      m <- length(t)
      dv <- matrix(0, m, mw - 2)
      for (j in 1:(mw - 2)) {
        h_tmp <- rep(0, mw)
        if (j == 1 & control$wleft != 'fixed') h_tmp[j] <-
epsilon
        if (j == (mw - 2) & control$wright != 'fixed') h_tmp[j
+ 2] <- epsilon
        h_tmp[j + 1] <- epsilon

```

```

        dv[, j] <- (spline(tw, y + h_tmp, xout = t, method
= 'hyman')$y
                    - spline(tw, y - h_tmp, xout = t, method
= 'hyman')$y) / (2 * epsilon)
    }
    return(dv)
  }
}
attr(v, 'mw') <- mw - 2
}
attr(v, 'tw') <- tw
attr(v, 'type') <- type
return(v)
}

```

```

##### make_homeo() #####
make_homeo <- function(w, tw, epsilon = 0.1) {
  mw <- length(w)
  ui <- diag(1, nrow = mw)
  ui <- rbind(ui, rep(0, mw))
  ui[cbind(2: (mw + 1), 1: mw)] <- -1

  ci <- (epsilon - 1) * diff(tw)
  res <- constrOptim_inf(theta = rep(0, mw), f = function(x)
mean((x - w)^2),
                        grad = function(x) 2 / mw * (x - w), ui
= ui, ci = ci, method = "BFGS")

  return(res$par)
}

```

```

##### resp_gene() #####
resp_gene <- function(true_data, t, betat1, betat2, ng, b0,
b1, b2, aa1, aa2, bb1, bb2, check = "T"){

  Align_train1 <- true_data[[5]];

  W1 <- Align_train1[[1]]%% betat1/(length(t))
  W2 <- Align_train1[[2]]%% betat2/(length(t))

```

```

x1 <- c(runif((ng/2), aa1, aa2), runif((ng/2), bb1, bb2))
x2 <- c(runif((ng/2), aa1, aa2), runif((ng/2), bb1, bb2))

Z <- b0 + x1*b1 + W1 + W2;

P <- 1/(1+exp(-Z))
y <- rep(0, ng)
for (i in 1:ng){
  y[i] <- rbinom(1, 1, P[i])
}

return(list(x1 = x1, x2 = x2, Z = Z, P = P, Res = y))
}

##### pavpop_fixrandwarp() #####
pavpop_fixrandwarp<- function(ya, yb, t, K, basis_fct,
warp_fct, amp_cov = NULL, warp_cov = NULL, amp_fct = NULL,
                                warped_amp = FALSE, iter = c(5, 5),
parallel = list(n_cores = 1, parallel_likeli hood = FALSE),
                                use_warp_gradient = FALSE,
warp_optim_method = 'CG', homeomorphisms = 'no',
like_optim_control = list()) {

  ya1 = ya[K[[1]]]
  ya2 = ya[K[[2]]]
  yb1 = yb[K[[1]]]
  yb2 = yb[K[[2]]]
  l1 = length(K[[1]])
  l2 = length(K[[2]])

  if (!is.null(amp_fct) & is.null(amp_cov))
    warning('Amplitude variation basis ignored when no
amplitude covariance is specified.')

  warp_centering <- TRUE
  # If the warps are not regularized, we should be careful
when centering.
  if (is.null(warp_cov)) warp_centering <- FALSE

```

```

nouter <- iter[1] + 1
if (is.null(amp_cov) & is.null(warp_cov)) nouter <- 1
ninner <- iter[2]
halt_iteration <- FALSE

# Set size parameters
n <- length(ya)
m <- sapply(ya, length)

# Warp parameters
tw <- attr(warp_fct, 'tw')
mw <- attr(warp_fct, 'mw')
if (all(is.na(tw))) tw <- rep(tw, mw + 2)
tw_int <- tw[2:(mw + 1)]

warp_type <- attr(warp_fct, 'type')
if (warp_type != 'piecewise linear' & warp_type != 'smooth')
homeomorphisms <- 'no'

# Unknown parameters
amp_cov_par <- eval(attr(amp_cov, 'param'))
warp_cov_par <- eval(attr(warp_cov, 'param'))
n_par_amp <- length(amp_cov_par)
n_par_warp <- length(warp_cov_par)

# Check for same data structures of y and t
if (length(t) != n) stop("y and t must have same length.")
if (!all(sapply(t, length) == m)) stop("Observations in
y and t must have same length.")

# Remove missing values
for (i in 1:n) {
  missing_indices <- is.na(y[[i]])
  y[[i]] <- y[[i]][!missing_indices]
  t[[i]] <- t[[i]][!missing_indices]
}
# Stored warped time
t_warped <- t

# Update m with cleaned data
m <- sapply(ya, length)

# Initialize cluster

```

```

doParallel::registerDoParallel(cores = parallel$ncores)

# Initialize warp parameters
w_fix1 <- array(0, dim = c(mw, 1)) #fixed warp parameters
w_ran1 <- array(0, dim = c(mw, l1)) #random warp parameters

w_fix2 <- array(0, dim = c(mw, 1)) #fixed warp parameters
w_ran2 <- array(0, dim = c(mw, l2)) #random warp parameters

# Compute amplitude precision matrices
Sinv <- fill_precision(t, amp_cov, amp_cov_par, amp_fct)

# Build warp covariance and inverse
if (!is.null(warp_cov)) {
  C <- warp_cov(tw_int, warp_cov_par)
  Cinv <- solve(C)
} else {
  C <- Cinv <- matrix(0, mw, mw)
}

# Estimate spline weights
c_a <- spline_weights(ya, t, Sinv, basis_fct)
d_a1 <- spline_weights_classpecifc(ya[K[[1]]], t[K[[1]]],
c_a, Sinv[K[[1]]], basis_fct)
d_a2 <- spline_weights_classpecifc(ya[K[[2]]], t[K[[2]]],
c_a, Sinv[K[[2]]], basis_fct)

c_b <- spline_weights(yb, t, Sinv, basis_fct)
d_b1 <- spline_weights_classpecifc(yb[K[[1]]], t[K[[1]]],
c_b, Sinv[K[[1]]], basis_fct)
d_b2 <- spline_weights_classpecifc(yb[K[[2]]], t[K[[2]]],
c_b, Sinv[K[[2]]], basis_fct)
# Construct warp derivative
dwarp <- list()
if (warp_type != 'smooth') {
  for (i in 1:n) {
    if (i <= l1)
      dwarp[[i]] <- warp_fct(w_fix1, w_ran1[, i], t[[i]],
w_grad = TRUE)
    else
      dwarp[[i]] <- warp_fct(w_fix2, w_ran2[, i-l1], t[[i]],
w_grad = TRUE)
    if (warp_type == 'piecewise linear') dwarp[[i]] <-

```

```

as(dwarp[[i]], "dgCMatrix")
  }
}

# Initialize best parameters
like_best <- Inf
w_fix1_best <- w_fix1
w_ran1_best <- w_ran1
w_fix2_best <- w_fix2
w_ran2_best <- w_ran2
c_a_best <- c_a
d_a1_best <- d_a1
d_a2_best <- d_a2
c_b_best <- c_b
d_b1_best <- d_b1
d_b2_best <- d_b2
amp_cov_par_best <- amp_cov_par
warp_cov_par_best <- warp_cov_par

cat('Outer\t:\tInner \t:\tEstimates\n')
for (iouter in 1:nouter) {
  if (halt_iteration & iouter != nouter) next
  # Outer loop
  if (iouter != nouter) cat(iouter, '\t:\t')
  for (iinner in 1:ninner) {
    # Inner loop
    if (iouter != nouter | nouter == 1) cat(iinner, '\t')

    # Predict warping parameters for all functional samples
    warp_change1 <- c(0, 0)
    warp_change2 <- c(0, 0)
    if (homeomorphisms == 'hard') {
      #TODO: constrainOptim
      stop("Hard homeomorphic constrained optimization for
warps is not implemented.")
    } else {
      # Estimate the fixed warping effect
      ww_fix1 <- optim(par = w_fix1, fn = posterior_fix, gr
= NULL, method = warp_optim_method, warp_fct = warp_fct, t
= t[K[[1]]], y1 = ya[K[[1]]], y2 = yb[K[[1]]], w2 = w_ran1,
c1 = c_a + d_a1, c2 = c_b + d_b1, Sinv = Sinv[K[[1]]], basis_fct
= basis_fct)$par
      ww_fix2 <- optim(par = w_fix2, fn = posterior_fix, gr
= NULL, method = warp_optim_method, warp_fct = warp_fct, t

```

```

= t[K[[2]]], y1 = ya[K[[2]]], y2 = yb[K[[2]]], w2 = w_ran2,
c1 = c_a + d_a2, c2 = c_b + d_b2, Sinv = Sinv[K[[2]]], basis_fct
= basis_fct)$par
  # Parallel prediction of warping parameters
  w_res1 <- foreach(i = 1:l1) %do% {
    gr <- NULL
    ww_ran1 <- optim(par = w_ran1[, i], fn =
posterior_rand, gr = gr, method = warp_optim_method, warp_fct
= warp_fct, t = t[K[[1]]][[i]], y1 = ya[K[[1]]][[i]], y2 =
yb[K[[1]]][[i]], w1 = ww_fix1, c1 = c_a + d_a1, c2 = c_b +
d_b1, Sinv = Sinv[K[[1]]][[i]], Cinv = Cinv, basis_fct =
basis_fct)$par
    if (homeomorphisms == 'soft') ww_ran1 <-
make_homeo(ww_ran1, tw)
    return(ww_ran1)
  }
  w_res2 <- foreach(i = 1:l2) %do% {
    gr <- NULL
    ww_ran2 <- optim(par = w_ran2[, i], fn =
posterior_rand, gr = gr, method = warp_optim_method, warp_fct
= warp_fct, t = t[K[[2]]][[i]], y1 = ya[K[[2]]][[i]], y2 =
yb[K[[2]]][[i]], w1 = ww_fix2, c1 = c_a + d_a2, c2 = c_b +
d_b2, Sinv = Sinv[K[[2]]][[i]], Cinv = Cinv, basis_fct =
basis_fct)$par
    if (homeomorphisms == 'soft') ww_ran2 <-
make_homeo(ww_ran2, tw)
    return(ww_ran2)
  }

  for (i in 1:l1) {
    warp_change1[1] <- warp_change1[1] + sum((w_fix1 +
w_ran1[, i] - ww_fix1 - w_res1[[i]])^2)
    warp_change1[2] <- max(warp_change1[2], abs(w_fix1
+ w_ran1[, i] - ww_fix1 - w_res1[[i]]))
  }
  for (i in 1:l2){
    warp_change2[1] <- warp_change2[1] + sum((w_fix2 +
w_ran2[, i] - ww_fix2 - w_res2[[i]])^2)
    warp_change2[2] <- max(warp_change2[2], abs(w_fix2
+ w_ran2[, i] - ww_fix2 - w_res2[[i]]))
  }

  # Fix warps that are considerably beyond

```

basis-function endpoints

```
# Pre-compute warped time
t_warped1 <- lapply(1:l1, function(i)
warp_fct(ww_fix1, w_res1[[i]], t[K[[1]][[i]]]))
t_warped2 <- lapply(1:l2, function(i)
warp_fct(ww_fix2, w_res2[[i]], t[K[[2]][[i]]]))
t_warped <- append(t_warped1, t_warped2)
max_outside <- 0.75
outside_frac1 <- sapply(t_warped1, function(t)
mean(attr(basis_fct, 'boundary')[1] < t & t < attr(basis_fct,
'boundary')[2]))
outside_frac2 <- sapply(t_warped2, function(t)
mean(attr(basis_fct, 'boundary')[1] < t & t < attr(basis_fct,
'boundary')[2]))
for (i in which(outside_frac1 < max_outside))
w_res1[[i]][] <- 0
for (i in which(outside_frac2 < max_outside))
w_res2[[i]][] <- 0

for (i in 1:l1) w_ran1[, i] <- w_res1[[i]]
for (i in 1:l2) w_ran2[, i] <- w_res2[[i]]
w_fix1 <- ww_fix1
w_fix2 <- ww_fix2

# Center warps
if (warp_centering & iinner != ninner) {
  w_ran1 <- w_ran1 - rowMeans(w_ran1)
  w_ran2 <- w_ran2 - rowMeans(w_ran2)
}
}
# Update precisions, if
if (warped_amp){
  Sinv <- fill_precision(t_warped, amp_cov, amp_cov_par,
amp_fct)
}

# Update spline weights
c_a <- spline_weights(ya, t_warped, Sinv, basis_fct)
d_a1 <- spline_weights_classpecifc(ya[K[[1]]],
t_warped[K[[1]]], c_a, Sinv[K[[1]]], basis_fct)
d_a2 <- spline_weights_classpecifc(ya[K[[2]]],
t_warped[K[[2]]], c_a, Sinv[K[[2]]], basis_fct)
c_b <- spline_weights(yb, t_warped, Sinv, basis_fct)
d_b1 <- spline_weights_classpecifc(yb[K[[1]]],
```



```

t_warped[K[[1]]], c_b, Sinv[K[[1]]], basis_fct)
  d_b2 <- spline_weights_classspecific(yb[K[[2]]],
t_warped[K[[2]]], c_b, Sinv[K[[2]]], basis_fct)
  if (max(warp_change1[2], warp_change1[2]) < 1e-2 /
sqrt(mw)) break #TODO: Consider other criteria
}

#
# Likelihood estimation of parameters (outer loop)
#

# Construct residual vector for given warp prediction
if (warp_type == 'smooth') {
  for (i in 1:n) #dwrap[[i]] <- warp_fct(w1, w2[, i],
t[[i]], w_grad = TRUE)
  {
    if (i <= l1) dwrap[[i]] <- warp_fct(w_fix1, w_ran1[,
i], t[[i]], w_grad = TRUE)
    else
      dwrap[[i]] <- warp_fct(w_fix2, w_ran2[, i-l1],
t[[i]], w_grad = TRUE)
  }
}
if (!is.null(warp_cov)) {
  Zis_a1 <- Zis(t_warped[K[[1]]], dwrap[K[[1]]],
basis_fct, c_a + d_a1)
  Zis_a2 <- Zis(t_warped[K[[2]]], dwrap[K[[2]]],
basis_fct, c_a + d_a2)
  Zis_a <- append(Zis_a1, Zis_a2)
  Zis_b1 <- Zis(t_warped[K[[1]]], dwrap[K[[1]]],
basis_fct, c_b + d_b1)
  Zis_b2 <- Zis(t_warped[K[[2]]], dwrap[K[[2]]],
basis_fct, c_b + d_b2)
  Zis_b <- append(Zis_b1, Zis_b2)
} else {
  Zis_a <- lapply(m, function(m) Matrix::Matrix(0, m,
mw))
  Zis_b <- lapply(m, function(m) Matrix::Matrix(0, m,
mw))
}
ra <- ya
rb <- yb
for (i in 1:n) {
  if (i <= l1) {

```

```

      ra[[i]]      <-      as.numeri c(ra[[i]]      -
basis_fct(t_warped[[i]]) %%% (c_a + d_a1) + Zi s_a1[[i]] %%%
w_ran1[, i])
      rb[[i]]      <-      as.numeri c(rb[[i]]      -
basis_fct(t_warped[[i]]) %%% (c_b + d_b1) + Zi s_b1[[i]] %%%
w_ran1[, i])
    }
    else {
      ra[[i]]      <-      as.numeri c(ra[[i]]      -
basis_fct(t_warped[[i]]) %%% (c_a + d_a2) + Zi s_a2[[i-11]] %%%
w_ran2[, i-11])
      rb[[i]]      <-      as.numeri c(rb[[i]]      -
basis_fct(t_warped[[i]]) %%% (c_b + d_b2) + Zi s_b2[[i-11]] %%%
w_ran2[, i-11])
    }
  }
}

```

```

# Check wheter the final outer loop has been reached
if (iouter != nouter) {
  t_like <- t
  if (warped_amp) t_like <- t_warped
  # Likelihood function
  like_fct <- function(par) {
    if (!is.null(amp_fct)) {
      like_amp(par, n_par = c(n_par_amp, n_par_warp), r =
r, Zi s = Zi s, amp_cov = amp_cov, warp_cov = warp_cov, amp_fct
= amp_fct, t = t_like, tw = tw_int)
    } else {
      like(par, n_par = c(n_par_amp, n_par_warp), ra = ra,
rb = rb, Zi s_a = Zi s_a, Zi s_b = Zi s_b, amp_cov = amp_cov,
warp_cov = warp_cov, t = t_like, tw = tw_int)
    }
  }
}

```

```

# Likelihood gradient

```

```

like_gr <- NULL
if (parallel$parallel_likeli hood) {
  # Construct parallel gradient
  like_gr <- function(par) {
    epsilon <- 1e-5
    rep(1:length(par), each = 2)
    res <- foreach(i = 1:length(par), .combine = 'c') %: %
      foreach(sign = c(1, -1), .combine = '-' ) %dopar% {
        h <- rep(0, length(par))

```

```

        h[i] <- sign * epsilon
        return(like_fct(par + h) / (2 * epsilon))
    }
    return(res)
}
} else {
    # Construct parallel gradient
    like_gr <- function(par) {
        epsilon <- 1e-5
        rep(1:length(par), each = 2)
        res <- rep(0, length(par))
        for (i in 1:length(par)) {
            for (sign in c(1, -1)) {
                h <- rep(0, length(par))
                h[i] <- sign * epsilon
                res[i] <- res[i] + sign * like_fct(par + h) / (2
* epsilon)
            }
        }
        return(res)
    }
}

# Estimate parameters using locally linearized
likelihood
lower <- if (is.null(like_optim_control$lower))
rep(1e-3, n_par_amp + n_par_warp) else
like_optim_control$lower
upper <- if (is.null(like_optim_control$upper))
rep(Inf, n_par_amp + n_par_warp) else
like_optim_control$upper
method <- if (is.null(like_optim_control$method))
"L-BFGS-B" else like_optim_control$method
ndeps <- if (is.null(like_optim_control$ndeps))
rep(1e-3, n_par_amp + n_par_warp) else
like_optim_control$ndeps

like_optim <- optim(c(amp_cov_par, warp_cov_par),
like_fct, gr = like_gr, method = method, lower = lower, upper
= upper, control = list(ndeps = ndeps, maxit = 20))
param <- like_optim$par

if (!is.null(amp_cov)) {
    # Handle type 'unstr_cov' which can be used in

```

```

combination with an
    # amplitude function. In this case, the found variance
parameters m
    # may not correspond to the nearest positive definite
matrix that
    # was actually used in computations
    if (!is.null(amp_fct) & attr(amp_cov, 'type') ==
'unstr_cov') {
        amp_cov_mat      <-      warp_cov(1:n_par_amp,
param[1:n_par_amp])
        amp_cov_par      <-      c(diag(amp_cov_mat),
warp_cov_mat[upper.tri(amp_cov_mat)])
    } else {
        amp_cov_par <- param[1:n_par_amp]
    }
}
if (!is.null(warp_cov)) {
    # Handle type 'unstr_cov' where found parameters may
not correspond to the nearest
    # positive definite matrix that was actually used in
computations
    if (attr(warp_cov, 'type') == 'unstr_cov') {
        warp_cov_mat <- warp_cov(tw_int, param[(n_par_amp +
1):length(param)])
        warp_cov_par      <-      c(diag(warp_cov_mat),
warp_cov_mat[upper.tri(warp_cov_mat)])
    } else {
        warp_cov_par      <-      param[(n_par_amp
1):length(param)]
    }
}

if (like_optim$value <= like_best) {
    # Save parameters
    like_best <- like_optim$value
    w_fix1_best <- w_fix1
    w_ran1_best <- w_ran1
    w_fix2_best <- w_fix2
    w_ran2_best <- w_ran2
    c_a_best <- c_a
    d_a1_best <- d_a1
    d_a2_best <- d_a2
    c_b_best <- c_b
}

```

```

d_b1_best <- d_b1
d_b2_best <- d_b2
amp_cov_par_best <- amp_cov_par
warp_cov_par_best <- warp_cov_par

# Update covariances
Sinv <- fill_precision(t, amp_cov, amp_cov_par,
amp_fct)

if (!is.null(warp_cov)) {
  C <- warp_cov(tw_int, warp_cov_par)
  Cinv <- solve(C)
}

cat(':',\t', param, '\n')
cat('Linearized likelihood:\t', like_best, '\n')
} else {
  cat('\nLikelihood not improved, returning best
likelihood estimates.\n')
  halt_iteration <- TRUE
}
} else {
  # TODO: Should in principle be done before warps are
  updated in the final iteration!
  # Estimate of sigma if final iteration is reached
  if (nouter == 1) {
    w_fix1_best <- w_fix1
    w_ran1_best <- w_ran1
    w_fix2_best <- w_fix2
    w_ran2_best <- w_ran2
    c_a_best <- c_a
    d_a1_best <- d_a1
    d_a2_best <- d_a2
    c_b_best <- c_b
    d_b1_best <- d_b1
    d_b2_best <- d_b2
  }

  t_like <- t
  if (warped_amp) t_like <- t_warped

  if (!is.null(amp_fct)) {
    sigma <- sqrt(sigm_sq_amp(c(amp_cov_par,
warp_cov_par), c(n_par_amp, n_par_warp), r, Zis, amp_cov,

```

```

warp_cov, amp_fct, t_like, tw_int))
  } else {
    sigma <- sqrt(sigmatq(c(amp_cov_par, warp_cov_par),
c(n_par_amp, n_par_warp), ra, rb, Zis_a, Zis_b, amp_cov,
warp_cov, t_like, tw_int))
  }
}
}
return(list(c_a = c_a_best, d_a1 = d_a1_best, d_a2 =
d_a2_best, c_b = c_b_best, d_b1 = d_b1_best, d_b2 = d_b2_best,
w_fix1 = w_fix1_best, w_ran1 = w_ran1_best, w_fix2 =
w_fix2_best, w_ran2 = w_ran2_best, amp_cov_par =
amp_cov_par_best, warp_cov_par = warp_cov_par_best, sigma =
sigma, like = like_best))
}

```

```

##### constrOptim_inf() #####
constrOptim_inf <-
function(theta, f, grad, ui, ci, mu = 0.0001, control =
list(),
        method = if(is.null(grad)) "Nelder-Mead" else
"BFGS",
        outer.iterations = 100, outer.eps = 0.00001, ...,
hessian = FALSE)
{

  if (!is.null(control$fnscale) && control$fnscale < 0)
    mu <- -mu ##maximizing

  R <- function(theta, theta.old, ...) {
    ui.theta <- ui%%theta
    gi <- ui.theta-ci
    if (any(gi<0)) return(sign(mu) * Inf)
    gi.old <- ui%%theta.old-ci
    bar <- sum(gi.old*log(gi)-ui.theta)
    if (!is.finite(bar)) bar <- -Inf
    f(theta, ...) -mu*bar
  }

  dR <- function(theta, theta.old, ...) {
    ui.theta <- ui%%theta
    gi <- drop(ui.theta-ci)

```

```

    gi.old <- drop(ui%%theta.old-ci)
    dbar <- colSums(ui*gi.old/gi-ui)
    grad(theta, ...) - mu*dbar
  }

  if (any(ui%%theta-ci <= 0))
    stop("initial value is not in the interior of the
feasible region")
  obj <- f(theta, ...)
  r <- R(theta, theta, ...)
  fun <- function(theta, ...) R(theta, theta.old, ...)
  gradient <- if(method == "SANN") {
    if(missing(grad)) NULL else grad
  } else function(theta, ...) dR(theta, theta.old, ...)
  totCounts <- 0
  s.mu <- sign(mu)

  for(i in seq_len(outer.iterations)) {
    obj.old <- obj
    r.old <- r
    theta.old <- theta

    a <- optim(theta.old, fun, gradient, control = control,
              method = method, hessian = hessian, ...)
    r <- a$value
    if (is.finite(r) && is.finite(r.old) &&
        abs(r - r.old) < (1e-3 + abs(r)) * outer.eps) break
    theta <- a$par
    totCounts <- totCounts + a$counts
    obj <- f(theta, ...)
    if (s.mu * obj > s.mu * obj.old) break
  }
  if (i == outer.iterations) {
    a$convergence <- 7
    a$message <- gettext("Barrier algorithm ran out of
iterations and did not converge")
  }
  if (mu > 0 && obj > obj.old) {
    a$convergence <- 11
    a$message <- gettextf("Objective function increased at
outer iteration %d", i)
  }
  if (mu < 0 && obj < obj.old) {
    a$convergence <- 11
  }

```

```

    a$message <- gettextf("Objective function decreased at
outer iteration %d", i)
  }
  a$outer.iterations <- i
  a$counts <- totCounts
  a$barrier.value <- a$value
  a$value <- f(a$par, ...)
  a$barrier.value <- a$barrier.value - a$value
  a
}

```

```

##### Aligned_curves() #####
Aligned_curves <- function(ya, yb, t, K0, res){
  n1 = length(K0[[1]]);
  n2 = length(K0[[2]]);
  Aligned_ya1 <- Aligned_yb1 <- matrix(0, nrow = n1, ncol =
length(t[[1]]));
  Aligned_ya2 <- Aligned_yb2 <- matrix(0, nrow = n2, ncol =
length(t[[1]]));

  Raw_ya1 <- Raw_yb1 <- matrix(0, nrow = n1, ncol =
length(t[[1]]));
  Raw_ya2 <- Raw_yb2 <- matrix(0, nrow = n2, ncol =
length(t[[1]]));

  for (i in 1:n1) {
    Aligned_ya1[i,] <- approx(warp_fct(res$w_fix1,
res$w_ran1[,i], t[[i]]), ya[[K0[[1]][i]]], xout = t[[i]],
rule = 2)$y
    Aligned_yb1[i,] <- approx(warp_fct(res$w_fix1,
res$w_ran1[,i], t[[i]]), yb[[K0[[1]][i]]], xout = t[[i]],
rule = 2)$y
    Raw_ya1[i,] <- ya[[K0[[1]][i]]]; Raw_yb1[i,] <-
yb[[K0[[1]][i]]];
  }

  for (i in 1:n2) {
    Aligned_ya2[i,] <- approx(warp_fct(res$w_fix2,
res$w_ran2[,i], t[[i]]), ya[[K0[[2]][i]]], xout = t[[i]],
rule = 2)$y
    Aligned_yb2[i,] <- approx(warp_fct(res$w_fix2,
res$w_ran2[,i], t[[i]]), yb[[K0[[2]][i]]], xout = t[[i]],
rule = 2)$y
  }
}

```



```

    Raw_ya2[i,] <- ya[[K0[[2]][i]]]; Raw_yb2[i,] <-
yb[[K0[[2]][i]]];
}

```

```

    return(list(Aligned_ya1 = Aligned_ya1, Aligned_yb1 =
Aligned_yb1, Aligned_ya2 = Aligned_ya2, Aligned_yb2 =
Aligned_yb2, Raw_ya1 = Raw_ya1, Raw_yb1 = Raw_yb1, Raw_ya2
= Raw_ya2, Raw_yb2 = Raw_yb2))

```

```

}

```

```

##### precision function#####
fill_precision <- function(t, cov_fct, param, amp_fct = NULL)
{
  n <- length(t)
  m <- sapply(t, length)

  # Check if covariance function is specified
  if (!is.null(cov_fct)) {
    # Check if functional basis for the amplitude variation
    is supplied
    if (!is.null(amp_fct)) {
      df <- attr(amp_fct, 'df')
      SSi nv <- chol2i nv(chol(cov_fct(1:df, param)))

      # Fill precision matrices
      Si nv <- list()
      for (i in 1:n) {
        A <- amp_fct(t[[i]])
        Si nv[[i]] <- diag(1, m[i]) - A %*% solve(SSi nv + t(A) %*%
A, t(A))
      }
      return(Si nv)
    } else {
      # No functional basis specified, invert covariance
      matrices

      # Check if inverse method is given
      if (!is.null(attr(cov_fct, 'inv_cov_fct'))) {
        lapply(t, attr(cov_fct, 'inv_cov_fct'), param =
param)
      }
    }
  }
}

```

```

    } else {
      # No inverse method given, manually invert
      lapply(lapply(t, cov_fct, param = param), function(x)
chol2inv(chol(x)))
    }
  }
} else {
  # No covariance specified, assuming iid. Gaussian noise
  lapply(m, Matrix::Diagonal, x = 1)
}
}

```

```

##### spline_weights() #####
spline_weights <- function(y, t, Sinv = NULL, basis_fct,
weights = NULL) {
  if (class(y) != 'list') {
    t <- as.matrix(t)
    y <- as.matrix(y)
    t <- lapply(1:ncol(t), function(i) t[, i])
    y <- lapply(1:ncol(y), function(i) y[, i])
  }

  n <- length(y)
  m <- sapply(y, length)

  nb <- attr(basis_fct, 'df')

  if (is.null(weights)) weights <- rep(1, n)

  Dmat <- matrix(0, nb, nb)
  dvec <- matrix(0, nb, 1)

  # If no precision matrix is supplied, use identity
  if (is.null(Sinv)) Sinv <- lapply(m, Matrix::Diagonal, x
= 1)

  for (i in 1:n) {
    basis <- basis_fct(t[[i]])
    bSinv <- weights[i] * (t(basis) %*% Sinv[[i]])
    Dmat <- Dmat + bSinv %*% basis
    dvec <- dvec + bSinv %*% y[[i]]
  }
}

```

```

if (attr(basis_fct, 'constraints') == 'positive') {
  qrDmat <- qr(Dmat)
  indices <- qrDmat$pivot[1:qrDmat$rank]

  c <- rep(0, ncol(basis))
  c[indices] <- quadprog::solve.QP(Dmat = Dmat[indices,
indices],
                                dvec = dvec[indices, ],
                                Amat = diag(nrow =
length(indices)))$solution
} else {
  # Faster to use qr?
  c <- as.numeric(MASS::ginv(as.matrix(Dmat)) %*% dvec)
}

return(c)
}

```

```

##### spline_weights_classspecific() #####
spline_weights_classspecific <- function(y, t, cc, Sinv = NULL,
basis_fct, weights = NULL) {
  if (class(y) != 'list') {
    t <- as.matrix(t)
    y <- as.matrix(y)
    t <- lapply(1:ncol(t), function(i) t[, i])
    y <- lapply(1:ncol(y), function(i) y[, i])
  }

  n <- length(y)
  m <- sapply(y, length)

  nb <- attr(basis_fct, 'df')

  if (is.null(weights)) weights <- rep(1, n)

  Dmat <- matrix(0, nb, nb)
  dvec <- matrix(0, nb, 1)

  # If no precision matrix is supplied, use identity
  if (is.null(Sinv)) Sinv <- lapply(m, Matrix::Diagonal, x
= 1)

```

```

for (i in 1:n) {
  basis <- basis_fct(t[[i]])
  bSinv <- weights[i] * (t(basis) %*% Sinv[[i]])
  Dmat <- Dmat + bSinv %*% basis
  dvec <- dvec + bSinv %*% (y[[i]] - basis %*% cc)
}

if (attr(basis_fct, 'constraints') == 'positive') {
  qrDmat <- qr(Dmat)
  indices <- qrDmat$pivot[1:qrDmat$rank]

  c <- rep(0, ncol(basis))
  c[indices] <- quadprog::solve.QP(Dmat = Dmat[indices,
indices],
                                dvec = dvec[indices, ],
                                Amat = diag(nrow =
length(indices)))$solution
} else {
  # Faster to use qr?
  c <- as.numeric(MASS::ginv(as.matrix(Dmat)) %*% dvec)
  c <- c - mean(c)
}

return(c)
}

```

```

##### Zis() #####
Zis <- function(t, dwarp, basis_fct, c) {
  n <- length(t)
  m <- sapply(t, length)
  mw <- ncol(dwarp[[1]])
  Zis <- list()
  for (i in 1:n) {
    Zis[[i]] <- matrix(Zi(t[[i]], dwarp[[i]], basis_fct, c),
m[i], mw)
  }
  return(Zis)
}

```

```
##### likelihood functions #####
like <- function(param, n_par, ra, rb, Zis_a, Zis_b, amp_cov,
warp_cov, t, tw) {
  amp_cov_par <- param[1:n_par[1]]
  warp_cov_par <- param[(n_par[1] + 1):length(param)]
  if (!is.null(warp_cov)) {
    C <- warp_cov(tw, warp_cov_par)
    Cinv <- chol2inv(chol(C))
  } else {
    C <- Cinv <- matrix(0, length(tw), length(tw))
  }

  n <- length(ra)
  m <- sapply(ra, length)

  sq_a <- logdet_a <- 0
  sq_b <- logdet_b <- 0
  for (i in 1:n) {
    if (!is.null(amp_cov)) {
      S <- amp_cov(t[[i]], amp_cov_par)
      U <- chol(S)
    } else {
      # TODO: SPARSE MATRIX COULD MAKE IT FASTER, THEN 'diag'
      cannot be used for logdet
      S <- U <- diag(1, m[i])
    }
    rra <- ra[[i]]
    ZZa <- Zis_a[[i]]
    rrb <- rb[[i]]
    ZZb <- Zis_b[[i]]

    if (!is.null(warp_cov)) {
      A_a <- backsolve(U, backsolve(U, ZZa, transpose = TRUE))
      LR_a <- chol2inv(chol(Cinv + Matrix::t(ZZa) %*% A_a))
      x_a <- t(A_a) %*% rra
      A_b <- backsolve(U, backsolve(U, ZZb, transpose = TRUE))
      LR_b <- chol2inv(chol(Cinv + Matrix::t(ZZb) %*% A_b))
      x_b <- t(A_b) %*% rrb
    } else {
      LR_a <- x_a <- 0
      LR_b <- x_b <- 0
    }
    sq_a <- sq_a + (sum(backsolve(U, rra, transpose = TRUE)^2)
```

```

      - t(x_a) %*% LR_a %*% x_a)
sq_b <- sq_b + (sum(backsolve(U, rrb, transpose = TRUE) ^2)
      - t(x_b) %*% LR_b %*% x_b)
logdet_tmp_a <- 0
logdet_tmp_b <- 0
if (!is.null(warp_cov)) {
  logdet_tmp_a <- determinant(LR_a)$modulus[1]
  logdet_tmp_b <- determinant(LR_b)$modulus[1]
}
logdet_a <- logdet_a - (logdet_tmp_a - 2 *
sum(log(diag(U))))
logdet_b <- logdet_b - (logdet_tmp_b - 2 *
sum(log(diag(U))))
}
if (!is.null(warp_cov)) {
  logdet_a <- logdet_a - n * determinant(Cinv)$modulus[1]
  logdet_b <- logdet_b - n * determinant(Cinv)$modulus[1]
}
sigmahat_a <- as.numeric(sq_a / sum(m))
sigmahat_b <- as.numeric(sq_b / sum(m))
res_a <- sum(m) * log(sigmahat_a) + logdet_a
res_b <- sum(m) * log(sigmahat_b) + logdet_b
return(res_a + res_b)
}

```

#' @describeIn like Likelihood function with amplitude variation in a functional basis.

```

like_amp <- function(param, n_par, r, Zis, amp_cov, warp_cov,
amp_fct, t, tw) {
  amp_cov_par <- param[1:n_par[1]]
  warp_cov_par <- param[(n_par[1] + 1):length(param)]

  # Compute warp cov
  if (!is.null(warp_cov)) {
    Cinv <- chol2inv(chol(warp_cov(tw, warp_cov_par)))
  } else {
    Cinv <- matrix(0, length(tw), length(tw))
  }

  # Compute amp cov
  df <- attr(amp_fct, 'df')
  if (!is.null(amp_cov)) {

```

```

    Si nv <- chol 2i nv(chol (amp_cov(1: df, amp_cov_par)))
  }

  n <- length(r)
  m <- sapply(r, length)

  sq <- logdet <- 0
  for (i in 1:n) {
    A <- amp_fct(t[[i]])
    ZZ <- Zi s[[i]]
    logdet_tmp <- 0

    if (!is.null(amp_cov)) {
      SLR <- diag(m[i]) - A %%% solve(Si nv + t(A) %%% A, t(A))
    } else {
      SLR <- diag(m[i], x = 1)
    }

    if (!is.null(warp_cov)) {
      LR <- chol 2i nv(chol (as.matrix(Ci nv + t(ZZ) %%% SLR %%%
ZZ)))
      logdet_tmp <- determinant(LR)$modulus[1]
    } else {
      LR <- Matrix::Matrix(data = 0, nrow = nrow(Ci nv), ncol
= nrow(Ci nv))
    }

    rr <- SLR %%% r[[i]]
    rz <- as.numeric(t(ZZ) %%% rr)
    sq <- sq + t(r[[i]]) %%% rr - t(rz) %%% LR %%% rz

    logdet <- logdet - logdet_tmp -
determinant(SLR)$modulus[1]
  }
  if (!is.null(warp_cov)) logdet <- logdet - n *
determinant(Ci nv)$modulus[1]
  sigmahat <- as.numeric(sq / sum(m))
  res <- sum(m) * log(sigmahat) + logdet
  return(res)
}

```

```
##### fpfr() #####
```

```

fpfr <- function(Y1, covariates, funcs, kz,
kb, family=binomial(link = "logit"), method = "REML",
smooth.cov=FALSE){
  kb = min(kz, kb)
  n = dim(funcs[[1]])[1]
  p = ifelse(is.null(covariates), 0, dim(covariates)[2])
  #N_subj = length(unique(subj))

  if(is.matrix(funcs)){
    Funcs = list(length=1)
    Funcs[[1]] = funcs
  }else{
    Funcs = funcs
  }

  # functional predictors
  N.Pred = length(Funcs) #N.Pred=2

  t = phi = psi = CJ = list(length = N.Pred)

  for (i in 1:N.Pred){
    t[[i]] = seq(0, 1, length = dim(Funcs[[i]])[2])
    N_obs = length(t[[i]]) #N_obs=m

    #de-mean the functions
    meanFunc = apply(Funcs[[i]], 2, mean, na.rm = TRUE)
    resd = sapply(1:length(t[[i]]), function(u)
Funcs[[i]][,u] - meanFunc[u])
    Funcs[[i]] = resd

    # construct and smooth covariance matrices
    G.sum <- matrix(0, N_obs, N_obs)
    G.count <- matrix(0, N_obs, N_obs)

    for(j in 1:dim(resd)[1]){
      row.ind = j
      temp = resd[row.ind, ] %*% t(resd[row.ind, ])
      G.sum <- G.sum + replace(temp, which(is.na(temp)), 0)
      G.count <- G.count + as.numeric(!is.na(temp))
    }

    G <- ifelse(G.count == 0, NA, G.sum/G.count)
  }

```



```

## get the eigen decomposition of the smoothed variance
matrix
  if(smooth.cov){
    G2 <- G
    M <- length(t[[i]])
    diag(G2) = rep(NA, M)
    g2 <- as.vector(G2)
    ## define a N*N knots for bivariate smoothing
    N <- 10

    ## bivariate smoothing using the gamm function
    t1 <- rep(t[[i]], each = M)
    t2 <- rep(t[[i]], M)
    newdata <- data.frame(t1 = t1, t2 = t2)
    K.0 <- matrix(predict(gam(as.vector(g2) ~ te(t1, t2, k
= N))), newdata), M, M) # smooth K.0
    K.0 <- (K.0 + t(K.0))/2

    eigenDecomp <- eigen(K.0)
  }else{
    eigenDecomp <- eigen(G)
  }

psi[[i]] = eigenDecomp$vectors[, 1:kz]

# set the basis to be used for beta(t)
num = kb - 2
qtiles <- seq(0, 1, length = num + 2)[-c(1, num + 2)]
knots <- quantile(t[[i]], qtiles)
phi[[i]] = cbind(1, t[[i]], sapply(knots, function(k)
((t[[i]] - k > 0) * (t[[i]] - k))))

C = matrix(0, nrow = dim(resd)[1], ncol = kz)

for(j in 1:dim(resd)[1]){
  C[j,] <- replace(resd[j,], which(is.na(resd[j,])),
0) %%% psi[[i]][, 1:kz]
}

J = t(psi[[i]]) %%% phi[[i]]/N_obs
CJ[[i]] = C %%% J
}

X = cbind(rep(1, n), covariates)

```

```

for (i in 1:N.Pred){
  X = cbind(X, CJ[[i]])
}

D = list(length = N.Pred)
for(i in 1:N.Pred){
  D[[i]] = diag(c(rep(0, 1+p), rep(0, kb*(i-1)), c(rep(0, 2),
rep(1, kb-2)), rep(0, kb*(N.Pred-i))))
}

## fit the model
fit = gam(Y1~X-1, paraPen = list(X=D), family=family,
method = method) #

## get the coefficient and betaHat estimates
coefs = fit$coef
fitted.vals <- as.matrix(X[, 1:length(coefs)]) %*% coefs

beta.covariates = coefs[1:(p+1)]

BetaHat = varBeta = varBetaHat = Bounds =
list(length(N.Pred))
for(i in 1:N.Pred){
  BetaHat[[i]] = phi[[i]] %*%
coefs[(2+p+kb*(i-1)):(1+p+kb*(i))]

  ## get the covariance matrix of the estimated functional
  coefficient

varBeta[[i]] = fit$Vp[(2+p+kb*(i-1)):(1+p+kb*(i)), (2+p+kb*(
i-1)):(1+p+kb*(i))]
varBetaHat[[i]] = phi[[i]] %*% varBeta[[i]] %*% t(phi[[i]])

  ## construct upper and lower bounds for betahat
  Bounds[[i]] = cbind(BetaHat[[i]] +
1.96*(sqrt(diag(varBetaHat[[i]]))),
BetaHat[[i]] -
1.96*(sqrt(diag(varBetaHat[[i]]))))
}

ret <- list(fit, fitted.vals, BetaHat, beta.covariates, X,
phi, psi, varBetaHat, Bounds)

```

```

    names(ret) <- c("fit", "fitted.vals", "BetaHat",
"beta.covariates", "X", "phi",
                  "psi", "varBetaHat", "Bounds")
  ret
}

```

```

##### test_wran() #####
test_wran <- function(warp_fct, res, dat, n, basis_fct,
amp_cov, axis){
  tw <- attr(warp_fct, 'tw')
  mw <- attr(warp_fct, 'mw')
  if (all(is.na(tw)))
    tw <- rep(tw, mw + 2)
  tw_int <- tw[2:(mw + 1)]
  # Compute amplitude precision matrices
  Sinv <- fill_precision(dat[[1]][1], amp_cov,
res$amp_cov_par, amp_fct)
  # Build warp covariance and inverse
  if (!is.null(warp_cov)) {
    C <- warp_cov(tw_int, res$warp_cov_par)
    Cinv <- solve(C)
  } else {
    C <- Cinv <- matrix(0, mw, mw)
  }

  w_ran = matrix(0, nrow = 7, ncol = n)

  for (i in 1:n){
    if (axis == '2D') w_ran[, i] <- test_warp_2D(dat[[i]][1],
dat[[i]][2], dat[[i]][3], res, basis_fct, amp_cov =
amp_cov, warp_fct = warp_fct, amp_fct = NULL,
warp_optim_method = 'CG', Sinv, Cinv)
    else if (axis == 'x') w_ran[, i]
<- pred_warp_1D(dat[[i]][1], dat[[i]][2], lt, res,
basis_fct, amp_cov = amp_cov, warp_fct = warp_fct, amp_fct
= NULL, warp_optim_method = 'CG', Sinv, Cinv)
    else w_ran[, i] <- pred_warp_1D(dat[[i]][1],
dat[[i]][3], lt, res, basis_fct, amp_cov = amp_cov,
warp_fct = warp_fct, amp_fct = NULL, warp_optim_method = 'CG',
Sinv, Cinv)
  }
  return(w_ran)
}

```

```
}
```

```
##### test_warp_2D() #####
test_warp_2D <- function(t0, y1, y2, res, basis_fct, amp_cov
= amp_cov, warp_fct = warp_fct, amp_fct = NULL,
                        warp_optim_method = 'CG', Sinv, Cinv){
  ww_ran1 <- optim(par = res$w_ran1[, 1], fn = posterior_rand,
gr = NULL, method = warp_optim_method, warp_fct = warp_fct,
t = t0, y1 = y1, y2 = y2, w1 = res$w_fix1, c1 = res$c_a + res$d_a1,
c2 = res$c_b + res$d_b1, Sinv = Sinv[[1]], Cinv = Cinv,
basis_fct = basis_fct)$par
  ww_ran2 <- optim(par = res$w_ran2[, 1], fn = posterior_rand,
gr = NULL, method = warp_optim_method, warp_fct = warp_fct,
t = t0, y1 = y1, y2 = y2, w1 = res$w_fix2, c1 = res$c_a + res$d_a2,
c2 = res$c_b + res$d_b2, Sinv = Sinv[[1]], Cinv = Cinv,
basis_fct = basis_fct)$par
  post1 <- posterior_classifi_2D(w1 = res$w_fix1, w2 =
ww_ran1, warp_fct = warp_fct, t = t0, y1 = y1, y2 = y2, basis_fct
= basis_fct, c1 = res$c_a + res$d_a1, c2 = res$c_b + res$d_b1,
Sinv = Sinv[[1]], Cinv = Cinv)
  post2 <- posterior_classifi_2D(w1 = res$w_fix2, w2 =
ww_ran2, warp_fct = warp_fct, t = t0, y1 = y1, y2 = y2, basis_fct
= basis_fct, c1 = res$c_a + res$d_a2, c2 = res$c_b + res$d_b2,
Sinv = Sinv[[1]], Cinv = Cinv)
  p1 <- exp(-post1/(res$sigma)^2)/(exp(-post1/(res$sigma)^2) +
exp(-post2/(res$sigma)^2))
  if (is.nan(p1) | p1 <= 1e-10) p1 <- 0
  return(c(ww_ran1, ww_ran2, post1, post2, p1))
}
```

```
##### pred_warp_1D() #####
pred_warp_1D <- function(t0, y, lt, res, basis_fct, amp_cov
= amp_cov, warp_fct = warp_fct,
                        amp_fct = NULL, warp_optim_method =
'CG', Sinv, Cinv){
  ww_ran1 <- optim(par = res$w_ran1[, 1], fn =
posterior_rand_1D, gr = NULL, method = warp_optim_method,
warp_fct = warp_fct, t = t0, y = y, w1 =
res$w_fix1, c = res$c + res$c1, Sinv = Sinv[[1]],
Cinv = Cinv, basis_fct = basis_fct)$par
  ww_ran2 <- optim(par = res$w_ran2[, 1], fn =
posterior_rand_1D, gr = NULL, method = warp_optim_method,
```

```

        warp_fct = warp_fct, t = t0, y = y, w1 =
res$w_fix2, c = res$c + res$c2, Sinv = Sinv[[1]],
        Cinv = Cinv, basis_fct = basis_fct)$par
    post1 <- posterior_classifi_1D(w1 = res$w_fix1, w2 =
ww_ran1, warp_fct = warp_fct, t = t0, y = y,
        basis_fct = basis_fct, c = res$c
+ res$c1, Sinv = Sinv[[1]], Cinv = Cinv)
    post2 <- posterior_classifi_1D(w1 = res$w_fix2, w2 =
ww_ran2, warp_fct = warp_fct, t = t0, y = y,
        basis_fct = basis_fct, c = res$c
+ res$c2, Sinv = Sinv[[1]], Cinv = Cinv)
    p1 <- exp(-post1/(res$sigma)^2)/(exp(-post1/(res$sigma)^2) +
exp(-post2/(res$sigma)^2))
    if (is.nan(p1) | p1 <= 1e-10) p1 <- 0
    return(c(ww_ran1, ww_ran2, post1, post2, p1))
}

```

```

##### posterior_rand() #####
posterior_rand <- function(w1, w2, warp_fct, t, y1, y2,
basis_fct, c1, c2, Sinv, Cinv, weights = NULL) {
    if (is.null(weights)) weights <- 1
    vt1 <- warp_fct(w1, w2, t)
    basis1 <- basis_fct(vt1)
    r1 <- weights*(y1 - basis1 %*% c1)
    vt2 <- warp_fct(w1, w2, t)
    basis2 <- basis_fct(vt2)
    r2 <- weights*(y2 - basis2 %*% c2)
    return((t(r1) %*% Sinv %*% r1 + t(r2) %*% Sinv %*% r2 +
2*weights*weights*t(w2) %*% Cinv %*% w2)[1])
}

```

```

##### posterior_classifi_1D() #####
posterior_classifi_1D <- function(w1, w2, warp_fct, t, y,
basis_fct, c, Sinv, Cinv) {
    vt <- warp_fct(w1, w2, t)
    basis <- basis_fct(vt)
    r <- y - basis %*% c
    return((t(r) %*% Sinv %*% r)[1])
}

```

```
##### posterior_classifi_2D()
#####
posterior_classifi_2D <- function(w1, w2, warp_fct, t, y1,
y2, basis_fct, c1, c2, Sinv, Cinv) {
  vt1 <- warp_fct(w1, w2, t)
  basis1 <- basis_fct(vt1)
  r1 <- y1 - basis1 %*% c1
  vt2 <- warp_fct(w1, w2, t)
  basis2 <- basis_fct(vt2)
  r2 <- y2 - basis2 %*% c2
  return((t(r1) %*% Sinv %*% r1 + t(r2) %*% Sinv %*% r2)[1])
}
```

```
##### func_coef() #####
func_coef <- function(Ay_train, covat, kz, kb, d = 'raw'){
  if (d == 'raw'){
    funcs_tr <- list(rbind(Ay_train[[5]], Ay_train[[7]]),
rbind(Ay_train[[6]], Ay_train[[8]]))
  }else{
    funcs_tr <- list(rbind(Ay_train[[1]], Ay_train[[3]]),
rbind(Ay_train[[2]], Ay_train[[4]]))
  }
  #funcs_te <- list(Align_Curve_data[[k]][[4]][[1]],
Align_Curve_data[[k]][[4]][[2]])
  X_tr <- predictor(covariates = covat, funcs = funcs_tr, kz
= kz, kb = kb, smooth.cov = FALSE)
  #attach(X_tr)
  fit = gam(y_tr~X_tr$X-1, paraPen = list(X = X_tr$D), family
= binomial(link = "logit"), method = "REML")
  return(fit$coef)
}
```

```
##### predictor() #####
predictor <- function(covariates, funcs, kz, kb,
smooth.cov=FALSE){
  kb = min(kz, kb)
  n = dim(funcs[[1]])[1]
```

```

p = ifelse(is.null(covariates), 0, dim(covariates)[2])
#N_subj = length(unique(subj))

if(is.matrix(funcs)){
  Funcs = list(length=1)
  Funcs[[1]] = funcs
}else{
  Funcs = funcs
}

# functional predictors
N.Pred = length(Funcs)

t = phi = psi = CJ = list(length = N.Pred)

for (i in 1:N.Pred){
  t[[i]] = seq(0,1,length = dim(Funcs[[i]])[2])
  N_obs = length(t[[i]])

  #de-mean the functions
  meanFunc = apply(Funcs[[i]], 2, mean, na.rm = TRUE)
  resd = sapply(1:length(t[[i]]), function(u)
Funcs[[i]][,u] - meanFunc[u])
  Funcs[[i]] = resd

  # construct and smooth covariance matrices
  G.sum <- matrix(0, N_obs, N_obs)
  G.count <- matrix(0, N_obs, N_obs)

  for(j in 1:dim(resd)[1]){
    row.ind = j
    temp = resd[row.ind, ] %*% t(resd[row.ind, ])
    G.sum <- G.sum + replace(temp, which(is.na(temp)), 0)
    G.count <- G.count + as.numeric(!is.na(temp))
  }

  G <- ifelse(G.count == 0, NA, G.sum/G.count)

  ## get the eigen decomposition of the smoothed variance
matrix
  if(smooth.cov){
    G2 <- G
    M <- length(t[[i]])
    diag(G2) = rep(NA, M)

```

```

g2 <- as.vector(G2)
## define a N*N knots for bivariate smoothing
N <- 10

## bivariate smoothing using the gamm function
t1 <- rep(t[[i]], each = M)
t2 <- rep(t[[i]], M)
newdata <- data.frame(t1 = t1, t2 = t2)
K.0 <- matrix(predict(gam(as.vector(g2) ~ te(t1, t2, k
= N))), newdata), M, M) # smooth K.0
K.0 <- (K.0 + t(K.0))/2

eigenDecomp <- eigen(K.0)
} else {
  eigenDecomp <- eigen(G)
}

psi[[i]] = eigenDecomp$vectors[, 1:kz]

# set the basis to be used for beta(t)
num = kb - 2
qtiles <- seq(0, 1, length = num + 2)[-c(1, num + 2)]
knots <- quantile(t[[i]], qtiles)
phi[[i]] = cbind(1, t[[i]], sapply(knots, function(k)
((t[[i]] - k > 0) * (t[[i]] - k))))

C = matrix(0, nrow = dim(resd)[1], ncol = kz)

for(j in 1:dim(resd)[1]){
  C[j,] <- replace(resd[j,], which(is.na(resd[j,])),
0) %%% psi[[i]][, 1:kz]
}

J = t(psi[[i]]) %%% phi[[i]]/N_obs
CJ[[i]] = C %%% J
}

X = cbind(rep(1, n), covariates)
for (i in 1:N.Pred){
  X = cbind(X, CJ[[i]])
}

D = list(length = N.Pred)
for(i in 1:N.Pred){

```



```

      D[[i]] = diag(c(rep(0, 1+p), rep(0, kb*(i-1)), c(rep(0, 2),
rep(1, kb-2)), rep(0, kb*(N.Pred-i))))
    }
    return(list(X=X, D=D))
  }

```

```

##### clasf_scal() #####
clasf_scal <- function(n, y) {
  X0 <- cbind(rep(1, 2*n), y$x1[1:(2*n)])
  D0 <- diag(rep(1, 2))
  y0 <- y$Res[1:(2*n)]
  fit = gam(y0~X0-1, paraPen = list(D0), family=binomial(link
= "logit"), method = "REML") #list(D0)
  coefs1 = fit$coef
  X1 <- cbind(rep(1, 2*n), y$x1[(2*n + 1):(4*n)])
  fitted.vals1 <- as.matrix(X1[, 1:length(coefs1)]) %*%
coefs1
  P0 <- 1/(1+exp(-fitted.vals1))
  Re0 <- as.numeric(P0>0.5)

  fiter1 <- mean(abs(y$P[(2*n + 1):(4*n)] - P0))
  er1 <- sum(as.numeric(y$Res[(2*n + 1):(4*n)] == Re0)/(2*n))
  ri1 <- randIndex(table(y$Res[(2*n + 1):(4*n)], Re0),
correct = F)[[1]]
  ari1 <- randIndex(table(y$Res[(2*n + 1):(4*n)], Re0),
correct = T)[[1]]

  C1 = c(fiter1, er1, ri1, ari1)
  return(list(C1 = C1, P0 = P0))
}

```

```

##### classi_fs() #####
classi_fs <- function(y, ng, dat, warp_fct, basis_fct, initial,
p, iteration, kz, kb, t2, res, w_ran_te1, coefs2) {
  ya_test <- yb_test <- list()
  for (i in 1:(2*ng)) {
    ya_test[[i]] = dat[[i]][[2]]
    yb_test[[i]] = dat[[i]][[3]]
  }
  P <- sample(0:1, 2*ng, replace = T)

  #er1 <- rep(0, 20)

```

```

iter <- 1
while (iter <= iteration){
  ss <- P
  Ay_test <-
Test_curves(ya_test, yb_test, t2, res, ss, w_ran_te1, warp_fct,
basis_fct)

  K0 = list(ind1 = which(ss>=0.5), ind2 = which(ss<0.5))
  Re0 <- c(rep(1, length(K0[[1]])),
rep(0, length(K0[[2]])))
  K00<- c(K0[[1]], K0[[2]])

  ##test the logistic model
  covt2 <- y$x1[(2*ng + 1):(4*ng)]
  #covt2 <- rbind(covt2[K0[[1]], ], covt2[K0[[2]], ])
  covt2 <- c(covt2[K0[[1]]], covt2[K0[[2]]])
  funcs_te <- list(rbind(Ay_test[[1]], Ay_test[[3]]),
rbind(Ay_test[[2]], Ay_test[[4]]))
  X_te <- predictor(covariates = as.matrix(covt2), funcs =
funcs_te, kz, kb, smooth.cov = FALSE)
  fitted.vals2 <- as.matrix(X_te$X[, 1:length(coefs2)]) %%%
coefs2
  P <- 1/(1+exp(-fitted.vals2))
  Re <- as.numeric(P>0.5)

  ##check the disagreements
  iter <- iter + 1
  #er1[iter] <- mean(abs(Re0- Re))
}

fiter2 <- mean(abs(y$P[(2*ng + 1):(4*ng)][K00]- P))
er2 <- sum(as.numeric(y$Res[(2*ng + 1):(4*ng)][K00] ==
Re)/(2*ng))
ri2 <- randIndex(table(y$Res[(2*ng + 1):(4*ng)][K00], Re),
correct = F)[[1]]
ari2 <- randIndex(table(y$Res[(2*ng + 1):(4*ng)][K00], Re),
correct = T)[[1]]
C2 = c(fiter2, er2, ri2, ari2)
return(list(C2 = C2, Ay_test = Ay_test))
}

##### Test_curves() #####
Test_curves <-

```

```

function(ya, yb, t, res, ss, w_ran, warp_fct, basis_fct){

  #ss <- w_ran_te1[7,]
  K0 = list(ind1 = which(ss>=0.5), ind2 = which(ss<0.5))
  n1 = length(K0[[1]]);
  n2 = length(K0[[2]]);
  Aligned_ya1 <- Aligned_yb1 <- matrix(0, nrow = n1, ncol =
length(t[[1]]));
  Aligned_ya2 <- Aligned_yb2 <- matrix(0, nrow = n2, ncol =
length(t[[1]]));
  Raw_ya1 <- Raw_yb1 <- matrix(0, nrow = n1, ncol =
length(t[[1]]));
  Raw_ya2 <- Raw_yb2 <- matrix(0, nrow = n2, ncol =
length(t[[1]]));

  for (i in 1:n1) {
    Aligned_ya1[i,] <- approx(warp_fct(res$w_fix1,
w_ran[, K0[[1]][i]][1:2], t[[i]]), ya[[K0[[1]][i]]], xout =
t[[i]], rule = 2)$y
    Aligned_yb1[i,] <- approx(warp_fct(res$w_fix1,
w_ran[, K0[[1]][i]][1:2], t[[i]]), yb[[K0[[1]][i]]], xout =
t[[i]], rule = 2)$y
    Raw_ya1[i,] <- ya[[K0[[1]][i]]]; Raw_yb1[i,] <-
yb[[K0[[1]][i]]];
  }

  for (i in 1:n2) {
    Aligned_ya2[i,] <- approx(warp_fct(res$w_fix2,
w_ran[, K0[[2]][i]][3:4], t[[i]]), ya[[K0[[2]][i]]], xout =
t[[i]], rule = 2)$y
    Aligned_yb2[i,] <- approx(warp_fct(res$w_fix2,
w_ran[, K0[[2]][i]][3:4], t[[i]]), yb[[K0[[2]][i]]], xout =
t[[i]], rule = 2)$y
    Raw_ya2[i,] <- ya[[K0[[2]][i]]]; Raw_yb2[i,] <-
yb[[K0[[2]][i]]];
  }

  return(list(Aligned_ya1 = Aligned_ya1, Aligned_yb1 =
Aligned_yb1, Aligned_ya2 = Aligned_ya2, Aligned_yb2 =
Aligned_yb2,
             Raw_ya1 = Raw_ya1, Raw_yb1 = Raw_yb1, Raw_ya2 =
Raw_ya2, Raw_yb2 = Raw_yb2))

}

```

```
##### clasf_func2() #####
clasf_func2 <- function(y, ng, dat, warp_fct, basis_fct, p,
iteration, kz, kb, t2, res, w_ran_te1, coefs2) {
  ya_test <- yb_test <- list()
  for (i in 1:(2*ng)){
    ya_test[[i]] = dat[[i]][[2]]
    yb_test[[i]] = dat[[i]][[3]]
  }

  P <- sample(0:1, 2*ng, replace = T)

  iter <- 1
  while (iter <= iteration){
    ss <- P
    Ay_test <-
Test_curves(ya_test, yb_test, t2, res, ss, w_ran_te1, warp_fct,
basis_fct)
    K0 = list(ind1 = which(ss>=0.5), ind2 = which(ss<0.5))
    Re0 <- c(rep(1, length(K0[[1]])),
rep(0, length(K0[[2]])))
    K00<- c(K0[[1]], K0[[2]])

    funcs_te <- list(rbind(Ay_test[[1]], Ay_test[[3]]),
rbind(Ay_test[[2]], Ay_test[[4]]))

    X_te <- predictor(covariates = NULL, funcs = funcs_te, kz,
kb, smooth.cov = FALSE)
    fitted.vals2 <- as.matrix(X_te$X[, 1:length(coefs2)]) %*%
coefs2
    P <- 1/(1+exp(-fitted.vals2))
    Re <- as.numeric(P>0.5)

    iter = iter + 1
  }

  fiter2 <- mean(abs(y$P[(2*ng + 1):(4*ng)][K00] - P))
  er2 <- sum(as.numeric(y$Res[(2*ng + 1):(4*ng)][K00] ==
Re)/(2*ng))
  ri2 <- randIndex(table(y$Res[(2*ng + 1):(4*ng)][K00], Re),
correct = F)[[1]]
  ari2 <- randIndex(table(y$Res[(2*ng + 1):(4*ng)][K00], Re),
```

```
correct = T)[[1]]  
  C2 = c(fiter2,er2, ri2, ari2)  
  return(list(C2 = C2, Ay_test = Ay_test))  
}
```
